# Supplementary material for: Transcriptomic analysis of leukocyte immunometabolic dynamics in hemorrhagic sepsis in Piaractus mesopotamicus
Source: Research Square preprint supplement (doi:10.21203/rs.3.rs-6959903/v1), 2025-06-30
Supplement: Supplementary file 1 [file 6b3dc1fd80f6652d9a2200e7.docx]

**Supplementary Table S2** - KEGG-Based Functional Classification and Enzyme Distribution in Leukocytes during sepsis.

| **Pathway** | **#Enzs in Pathway** | **Enzyme** |
| --- | --- | --- |
| **Lipid metabolism** | **94** |  |
| Arachidonic acid metabolism | 7 | synthase; peroxidase; epoxide hydrolase; 12-lipoxygenase; A2; synthase; hydrolase |
| Alpha-Linolenic acid metabolism | 3 | A2; hydratase; oxidase |
| Biosynthesis of unsaturated fatty acids | 5 | reductase; reductase (NADPH); hydratase; 9-desaturase; oxidase |
| Linoleic acid metabolism | 1 | A2 |
| Primary bile acid biosynthesis | 1 | dehydrogenase |
| Sphingolipid metabolism | 7 | phosphodiesterase; phosphatase; cerebroside galactosidase; psychosine hydrolase; acylsphingosine deacylase; lactase  (ambiguous); neuraminidase |
| Ether lipid metabolism | 8 | Phosphodiesterase; EPT; cholinephosphotransferase; synthase;;  A2; esterase; phosphatase; D |
| Cutin, suberine and wax biosynthesis | 1 | O-acyltransferase |
| Glycerophospholipid metabolism | 18 | Phosphodiesterase; kinase (ATP; decarboxylase; EPT; - cholinephosphotransferase; 3-phosphatidyltransferase; A2; lecithinase B; O-acyltransferase; phosphatase; N-methyltransferase; dehydrogenase (NAD+); cytidylyltransferase; N-methyltransferase; dehydrogenase [NAD(P)+]; phosphodiesterase; D; dehydrogenase |
| Synthesis and degradation of ketone bodies | 5 | synthase; lyase; CoA-transferase;C-acetyltransferase; dehydrogenase |
| Fatty acid degradation | 8 | ligase; hydratase; O-palmitoyltransferase; - hydratase; dehydrogenase (NAD+); C-acetyltransferase; dehydrogenase; oxidase |
| Glycerolipid metabolism | 11 | kinase (ATP); kinase (2); 3-kinase; - lipase; O-acyltransferase; lipase; O-acyltransferase; phosphatase; dehydrogenase (NAD+); reductase |
| Steroid biosynthesis | 2 | synthase; Delta-isomerase |
| Fatty acid biosynthesis | 7 | carboxylase; reductase; ligase; S-malonyltransferase; hydrolase; synthase I; reductase (NADPH, Si-specific) |
| Fatty acid elongation | 5 | hydrolase; hydratase; reductase (NADPH); hydratase; dehydrogenase |
| Steroid hormone biosynthesis | 5 | O-methyltransferase; dehydrogenase; 4-dehydrogenase (NADP+); 17-dehydrogenase;1-naphthol glucuronyltransferase |
| **Metabolism of other amino acids** | **9** |  |
| Taurine and hypotaurine metabolism | 1 | glutamyl transpeptidase |
| Cyanoamino acid metabolism | 3 | hydroxymethyltransferase; glutamyl transpeptidase; asparaginase II |
| Selenocompound metabolism | 5 | adenylyltransferase; reductase; synthase; water dikinase; ligase |
| **Energy metabolism** | **47** |  |
| Sulfur metabolism | 3 | sulfurtransferase; kinase; adenylyltransferase |
| Carbon fixation pathways in prokaryotes | 13 | carboxylase (2); reductase [NAD(P)H]; dehydrogenase; hydratase; hydratase; ligase; mutase; hydratase; C-acetyltransferase; dehydrogenase; dehydrogenase; dehydrogenase (NADP+) |
| Oxidative phosphorylation | 8 | diphosphatase; dehydrogenase; ATPase; oxidase; ATPase; reductase (H+-translocating); reductase; dehydrogenase |
| Methane metabolism | 9 | hydroxymethyltransferase; aldolase; phosphohexokinase; ligase; hexose diphosphatase; dehydrogenase; hydrolase; hydratase; dehydrogenase |
| Nitrogen metabolism | 3 | dehydratase; ligase; dehydrogenase [NAD(P)+] |
| | Carbon fixation in photosynthetic organisms | | --- | | 11 | aldolase; glycolaldehydetransferase; kinase; hexose diphosphatase; dehydrogenase (phosphorylating); isomerase (2); transaminase (2); dehydrogenase; dehydrogenase (decarboxylating) |
| **Xenobiotics biodegradation and metabolism** | **38** |  |
| Steroid degradation | 2 | dehydrogenase; 4-dehydrogenase (acceptor) |
| Drug metabolism - other enzymes | 16 | kinase (2); deaminase; diphosphatase; ali-esterase;  S-methyltransferase; dehydrogenase; N-acetyltransferase;synthase (glutamine-hydrolysing); beta-glucuronide glucuronohydrolase glucuronidase; phosphoribosyltransferase;  1-naphthol glucuronyltransferase;  phosphoribosyltransferase; N-carbamoyl-beta-alanine amidohydrolase; phosphorylase (2) |
| Drug metabolism - cytochrome P450 | 3 | transferase; dehydrogenase [NAD(P)+];  1-naphthol glucuronyltransferase |
| Metabolism of xenobiotics by cytochrome P450 | 4 | transferase; dehydrogenase [NAD(P)+]; epoxide hydrolase; 1-naphthol glucuronyltransferase |
| Aminobenzoate degradation | 4 | acetylphosphatase; nitrophenyl phosphatase; phosphatase; hidratasse |
| Chloroalkane and chloroalkene degradation | 2 | epoxide hydrolase; dehydrogenase (NAD+) |
| Toluene degradation | 1 | dehydrogenase |
| Benzoate degradation | 3 | hydratase; C-acetyltransferase; dehydrogenase |
| Caprolactam degradation | 2 | hydratase; dehydrogenase |
| Nitrotoluene degradation | 1 | N-acetyltransferase |
| **Amino acid metabolismo** | **135** |  |
| Arginine and proline metabolism | 18 | decarboxylase; synthase (NADPH); oxidase; N-methyltransferase; kinase; arginine amidinase; 5-kinase; dehydrogenase (2); aldolase; dioxygenase; synthase (2) decarboxylase; N-acetyltransferase; transaminase; dehydrogenase (NAD+); reductase |
| Tryptophan metabolism | 10 | N-acetyltransferase; equilase; 3,4-dioxygenase; transaminase; hydratase; dehydrogenase (NAD+); C-acetyltransferase; dehydrogenase; dehydrogenase (succinyl-transferring); 5-monooxygenase |
| Arginine biosynthesis | 10 | synthase (NADPH); synthase; arginine amidinase; ligase; lyase; transaminase (2); acid amidohydrolase; dehydrogenase [NAD(P)+]; glutaminase I |
| Valine, leucine and isoleucine degradation | 12 | synthase; lyase; dehydrogenase (CoA-acylating); ligase; mutase; CoA-transferase; dehydrogenase; hydratase; dehydrogenase (NAD+);C-acetyltransferase; dehydrogenase; dehydrogenase |
| Lysine degradation | 11 | succinyltransferase; transaminase; dehydrogenase; dioxygenase; 5-dioxygenase; N-methyltransferase; hydratase; dehydrogenase (NAD+); C-acetyltransferase; dehydrogenase; dehydrogenase (succinyl-transferring) |
| Cysteine and methionine metabolism | 20 | decarboxylase; synthase; transaminase; synthase; ligase; dioxygenase [iron(II)-requiring]; synthase; synthase; adenosyltransferase; synthase; transaminase; S-adenosylhomocysteine synthase; transaminase; 1-phosphate dehydratase; (cytosine-5-)-methyltransferase; ammonia-lyase; dehydrogenase; phosphorylase; dehydrogenase; isomerase |
| Phenylalanine, tyrosine and tryptophan biosynthesis | 5 | transaminase (4); 4-monooxygenase |
| Lysine biosynthesis | 2 | transaminase; transaminase |
| Phenylalanine metabolism | 9 | transaminase; dioxygenase; transaminase (3); hydratase; dehydrogenase [NAD(P)+]; 4-monooxygenase; oxidase |
| Glycine, serine and threonine metabolism | 11 | hydroxymethyltransferase; oxidase; N-methyltransferase; dehydrogenase (aminomethyl-transferring); 3-kinase; synthase; dehydrogenase; S-aminomethyldihydrolipoylprotein:(6S)-tetrahydrofolate aminomethyltransferase (ammonia-forming); ammonia-lyase; dehydrogenase; oxidase |
| Tyrosine metabolism | 8 | O-methyltransferase; transaminase; dioxygenase; transaminase; transaminase; transaminase; dehydrogenase [NAD(P)+]; oxidase |
| Alanine, aspartate and glutamate metabolism | 16 | transaminase (isomerizing); transaminase; synthase; synthase;ligase; lyase; lyase; carbamoyltransferase; transaminase; transaminase; synthase (glutamine-hydrolysing); synthase (glutamine-hydrolysing); dehydrogenase [NAD(P)+]; glutaminase I; asparaginase II; alpha-keto acid-omega-amidase |
| Histidine metabolism | 3 | transaminase; dehydrogenase [NAD(P)+]; dehydrogenase (NAD+) |
| **Glycan biosynthesis and metabolism** | **54** |  |
| Other types of O-glycan biosynthesis | 4 | mannosyltransferase; 3-beta-N-acetylglucosaminyltransferase; 3-beta-glucuronosyltransferase; alpha-2,3-sialyltransferase |
| Various types of N-glycan biosynthesis | 6 | alpha-1,2-mannosyltransferase;-beta-N-acetylglucosaminyltransferase; alpha-2,3-sialyltransferase; hexosaminidase; 1,2-alpha-mannosidase; 6-alpha-L-fucosyltransferase |
| Mucin type O-Glycan biosynthesis | 3 | 3-beta-galactosyltransferase; alpha-2,3-sialyltransferase;alpha-2,6-sialyltransferase |
| Other glycan degradation | 7 | psychosine hydrolase; alpha-fucosidase; hexosaminidase; endo-beta-N-acetylglucosaminidase; alpha-D-mannosidase; lactase (ambiguous); neuraminidase |
| N-Glycan biosynthesis | 7 | alpha-1,2-mannosyltransferase; 2-beta-N-acetylglucosaminyltransferase; 4-beta-N-acetylglucosaminyltransferase; 6-beta-N-acetylglucosaminyltransferase; 1,2-alpha-mannosidase; beta-D-mannosyltransferase; 6-alpha-L-fucosyltransferase |
| Glycosphingolipid biosynthesis - ganglio series | 3 | alpha-2,3-sialyltransferase; hexosaminidase; lactase (ambiguous) |
| Glycosphingolipid biosynthesis - lacto and neolacto series | 3 | beta-1,3-acetylglucosaminyltransferase; alpha-2,3-sialyltransferase; alpha-2,3-sialyltransferase |
| Glycosylphosphatidylinositol(GPI)-anchor biosynthesis | 1 | N-acetylglucosaminyltransferase |
| Peptidoglycan biosynthesis | 1 | MraY transferase |
| Glycosaminoglycan biosynthesis - heparan sulfate/heparin | 4 | 4-beta-galactosyltransferase; 3-beta-glucuronosyltransferase; xylosyltransferase; 5-epimerase |
| Glycosaminoglycan biosynthesis - keratan sulfate | 4 | sulfotransferase; alpha-2,3-sialyltransferase; alpha-2,3-sialyltransferase; 6-alpha-L-fucosyltransferase |
| Glycosaminoglycan biosynthesis - chondroitin sulfate/  dermatan sulfate | 3 | 4-beta-galactosyltransferase; 3-beta-glucuronosyltransferase; xylosyltransferase |
| Glycosaminoglycan degradation | 6 | chondroitinsulfatase (2); hexosaminidase; lactase (ambiguous); beta-glucuronide glucuronohydrolase glucuronidase; hyaluronidase |
| Glycosphingolipid biosynthesis - globo series | 2 | alpha-2,3-sialyltransferase; hexosaminidase |
| **Metabolism of cofactors and vitamins** | **58** |  |
| Lipoic acid metabolism | 2 | synthase; transferase |
| Ubiquinone and other terpenoid-quinone biosynthesis | 2 | dioxygenase; transaminase |
| Biotin metabolism | 4 | reductase; ligase; synthase I; reductase (NADPH, Si-specific) |
| Pantothenate and CoA biosynthesis | 5 | decarboxylase; kinase (2); synthase; N-carbamoyl-beta-alanine amidohydrolase |
| One carbon pool by folate | 8 | cyclo-ligase; formyltransferase; hydroxymethyltransferase;reductase [NAD(P)H] S-aminomethyldihydrolipoylprotein:(6S)-tetrahydrofolate aminomethyltransferase (ammonia-forming); synthase (2); dehydrogenase |
| Porphyrin and chlorophyll metabolism | 12 | synthase; decarboxylase; synthase; ferro-protoporphyrin chelatase;synthase; synthase; synthase; ligase; beta-glucuronide glucuronohydrolase glucuronidase; 1-naphthol glucuronyltransferase; oxidase (2) |
| Nicotinate and nicotinamide metabolism | 7 | kinase; adenylyltransferase; uridine 5'-nucleotidase; glycohydrolase; adenylyltransferase; transhydrogenase (Re/Si-specific); diphosphorylase (carboxylating |
| Vitamin B6 metabolism | 2 | 5'-phosphate synthase; kinase |
| Riboflavin metabolism | 2 | kinase; synthetase |
| Retinol metabolism | 5 | dehydrogenase; 13,14-reductase; dehydrogenase (NAD+); isomerohydrolase; 1-naphthol glucuronyltransferase |
| Thiamine metabolism | 4 | desulfurase; phosphatase; thiamine-triphosphatase; diphosphokinase |
| Folate biosynthesis | 5 | synthase (2); reductase (L-erythro-7,8-dihydrobiopterin forming); reductase; synthase |
| **Carbohydrate metabolism** | **217** |  |
| Pyruvate metabolism | 17 | carboxylase (2); acetylphosphatase; hydratase; kinase; ligase; acetyltransferase; dehydrogenase; hydrolase; dehydrogenase (NAD+); C-acetyltransferase; dehydrogenase; lyase; dehydrogenase (decarboxylating); dehydrogenase (oxaloacetate-decarboxylating); dehydrogenase; dehydrogenase (acetyl-transferring) |
| Pentose phosphate pathway | 13 | aldolase; glycolaldehydetransferase; deoxyribokinase; phosphohexokinase; hexose diphosphatase; aldolase; diphosphokinase; phosphogluconolactonase; isomerase (2)dehydrogenase (NADP+-dependent, decarboxylating); dehydrogenase (NADP+); (alpha-D-glucose-1,6-bisphosphate-dependent) |
| Amino sugar and nucleotide sugar metabolism | 20 | transaminase (isomerizing); decarboxylase; hexokinase type IV glucokinase; galactokinase (phosphorylating); 4-epimerase; uridylyltransferase; synthase; deaminase; isomerase (2); hexosaminidase; cytidylyltransferase; guanylyltransferase; uridylyltransferase; reductase; monooxygenase; (alpha-D-glucose-1,6-bisphosphate-dependent); mutase; mannose phosphomutase; chitodextrinase |
| Citrate cycle (TCA cycle) | 13 | carboxylase; succinyltransferase; dehydrogenase; hydratase (2); acetyltransferase; dehydrogenase; dehydrogenase; dehydrogenase (NADP+); dehydrogenase (NAD+); (Si)-synthase; dehydrogenase (succinyl-transferring); dehydrogenase (acetyl-transferring) |
| C5-Branched dibasic acid metabolismo | 1 | Decarboxylase |
| Glycolysis / Gluconeogenesis | 21 | aldolase; kinase (2); hexokinase type IV glucokinase; phosphohexokinase; ligase; 1-epimerase; phosphatase; - acetyltransferase; hexose diphosphatase; dehydrogenase (phosphorylating); dehydrogenase; isomerase (2); glucose 6-phosphate phosphatase; hydratase; dehydrogenase [NAD(P)+]; dehydrogenase (NAD+); (alpha-D-glucose-1,6-bisphosphate-dependent); dehydrogenase; dehydrogenase (acetyl-transferring) |
| Starch and sucrose metabolism | 15 | decarboxylase; hexokinase type IV glucokinase; diphosphatase; uridylyltransferase; isomerase; glucose 6-phosphate phosphatase; (alpha-D-glucose-1,6-bisphosphate-dependent); trehalase; beta-glucuronide glucuronohydrolase glucuronidase; amylo-1,6-glucosidase; phosphorylase; branching enzyme; 1-naphthol glucuronyltransferase; synthase; disproportionating enzyme |
| Inositol phosphate metabolism | 20 | 3-kinase; 4-kinase; 5-kinase; 5-phosphatase; phospholipase C; 3-phosphatase; 4-phosphatase; inositol-1,3-bisphosphate 3-phosphatase; phosphatase; dehydrogenase (acetylating); 4-kinase; 3-kinase; 1-kinase; 2-kinase; 5/6-kinase; 3-kinase; 3-kinase; isomerase; synthase; oxygenase |
| Butanoate metabolism | 10 | synthase; transaminase; dehydrogenase; lyase; ligase; CoA-transferase; hydratase; C-acetyltransferase; dehydrogenase (2) |
| Pentose and glucuronate interconversions | 6 | uridylyltransferase; dehydrogenase (NAD+); reductase; beta-glucuronide glucuronohydrolase glucuronidase; reductase; 1-naphthol glucuronyltransferase |
| Glyoxylate and dicarboxylate metabolism | 11 | hydroxymethyltransferase; hydratase; ligase; equilase; aldolase; 3-kinase; phosphatase; mutase; C- |
| Propanoate metabolism | 11 | carboxylase; transaminase; dehydrogenase (CoA-acylating); decarboxylase; ligase; dehydrogenase (acetylating); mutase; dehydrogenase; hydratase; C-acetyltransferase; dehydrogenase |
| Ascorbate and aldarate metabolism | 4 | dehydrogenase (NAD+); reductase; 1-naphthol glucuronyltransferase; oxygenase |
| Galactose metabolism | 11 | hexokinase type IV glucokinase; galactokinase (phosphorylating); phosphohexokinase; 1-epimerase; 4-epimerase; uridylyltransferase; glucose 6-phosphate phosphatase; uridylyltransferase; (alpha-D-glucose-1,6-bisphosphate-dependent); lactase (ambiguous); reductase |
| Fructose and mannose metabolism | 14 | phosphofructokinase 2; aldolase; 2-phosphatase; hexokinase type IV glucokinase; phosphohexokinase; hexose diphosphatase; diphosphatase; synthase; isomerase (2); isomerase; guanylyltransferase; mannose phosphomutase; reductase |
| Glutathione metabolism | 14 | peroxidase; reductase; synthase; ligase; synthase; transferase; synthase; decarboxylase; - dehydrogenase (NADP+-dependent, decarboxylating); dehydrogenase (NADP+); gamma-glutamyl-amino acid cyclotransferase; glutamyl transpeptidase; dehydrogenase (NADP+); thioredoxin peroxidase |
| beta-Alanine metabolism | 11 | transaminase; decarboxylase; synthase (2); dehydrogenase (acetylating); dehydrogenase; hydratase; dehydrogenase [NAD(P)+]; dehydrogenase (NAD+); N-carbamoyl-beta-alanine amidohydrolase; oxidase |
| D-Arginine and D-ornithine metabolism | 1 | Oxidase |
| D-Glutamine and D-glutamate metabolism | 2 | dehydrogenase [NAD(P)+]; glutaminase I |
| Phosphonate and phosphinate metabolism | 2 | EPT; cholinephosphotransferase |
| **Metabolism of terpenoids and polyketides** | 24 |  |
| Polyketide sugar unit biosynthesis | 1 | 4,6-dehydratase |
| Geraniol degradation | 3 | Geraniol degradation |
| Sesquiterpenoid and triterpenoid biosynthesis | 1 | Synthase |
| Zeatin biosynthesis | 1 | Dimethylallyltransferase |
| Brassinosteroid biosynthesis | 1 | 4-dehydrogenase (NADP+) |
| Limonene and pinene degradation | 2 | hydratase; dehydrogenase (NAD+) |
| Terpenoid backbone biosynthesis | 12 | synthase; kinase; kinase; diphosphate synthase; oxidase; geranyl-diphosphate synthase; 4-phosphate cytidylyltransferase; O-methyltransferase; Delta-isomerase; farnesyltransferase; C-acetyltransferase; reductase (NADPH) |
| Tetracycline biosynthesis | 1 | Carboxylase |
| Biosynthesis of vancomycin group antibiotics | 1 | 4,6-dehydratase |
| Biosynthesis of ansamycins | 1 | 4,6-dehydratase  Glycolaldehydetransferase |
| **Biosynthesis of other secondary metabolites** | **30** |  |
| Caffeine metabolism | 1 | N-acetyltransferase |
| Acarbose and validamycin biosynthesis | 1 | 4,6-dehydratase |
| Streptomycin biosynthesis | 5 | hexokinase type IV glucokinase; phosphatase; 4,6-dehydratase; synthase; (alpha-D-glucose-1,6-bisphosphate-dependent) |
| Indole alkaloid biosynthesis | 1 | Synthase |
| Betalain biosynthesis | 1 | O-methyltransferase |
| Penicillin and cephalosporin biosynthesis | 1 | oxidase |
| Tropane, piperidine and pyridine alkaloid biosynthesis | 5 | transaminase (4); oxidase |
| Novobiocin biosynthesis | 4 | transaminase (4) |
| Isoquinoline alkaloid biosynthesis | 4 | transaminase(3); oxidase |
| Monobactam biosynthesis | 1 | Adenylyltransferase |
| Flavone and flavonol biosynthesis | 1 | beta-glucuronide glucuronohydrolase glucuronidase |
| Phenylpropanoid biosynthesis | 1 | Lactoperoxidase |
| Aflatoxin biosynthesis | 1 | Carboxylase |
| Butirosin and neomycin biosynthesis | 1 | hexokinase type IV glucokinase |
| Carbapenem biosynthesis | 2 | 5-kinase; dehydrogenase |
| **Nucleotide metabolism** | **65** |  |
| Purine metabolism | 37 | formyltransferase; kinase (6); synthase (2); adenylpyrophosphatase; diphosphate phosphatase; phosphodiesterase; deaminase (2); lyase; reductase (2); phosphatase; phosphatase; adenylyltransferase; diphosphatase; dinucleosidetriphosphatase; RNA polymerase; DNA polymerase; nucleotidyltransferase; diphosphokinase; hydrogenase (2); cyclase (2); 3'- cleotidase; uridine 5'-nucleotidase; (alpha-D-glucose-1,6-bisphosphate-dependent); synthase (glutamine-hydrolysing); cyclohydrolase; phosphoribosyltransferase (2) |
| Pyrimidine metabolism | 28 | kinase (2); synthase (glutamine hydrolysing); diphosphate phosphatase; dehydrogenase (quinone); decarboxylase; kinase; deaminase; reductase; carbamoyltransferase; kinase; diphosphatase; diphosphatase; RNA polymerase; DNA polymerase; nucleotidyltransferase; reductase; synthase; 3'-mononucleotidase; uridine 5'-nucleotidase; synthase (glutamine-hydrolysing); phosphoribosyltransferase; deoxyribosyltransferase; N-carbamoyl-beta-alanine amidohydrolase; phosphorylase; phosphorylase; kinase; phosphorylase |
| **Signal transduction** | **23** |  |
| mTOR signaling pathway | 2 | 3-kinase; protein kinase |
| PI3K-Akt signaling pathway | 1 | 3-kinase |
| | Phosphatidylinositol signaling system | | --- | | 20 | kinase (ATP); 3-kinase; 4-kinase; 5-kinase; 5-phosphatase; phospholipase C; 3-phosphatase; 4-phosphatase; inositol-1,3-bisphosphate 3-phosphatase; phosphatase; 4-kinase; 3-kinase; 2-kinase; 5/6-kinase (2); kinase C; cytidylyltransferase; kinase (2) |
| **Translation** | **16** |  |
| Aminoacyl-tRNA biosynthesis | 16 | ligase (5); synthase (glutamine-hydrolysing); ligase (10) |
| **Global and overview maps** | **84** |  |
| Biosynthesis of antibiotics | 84 | synthase; carboxylase; formyltransferase; transaminase (isomerizing); hydroxymethyltransferase; synthase (NADPH); succinyltransferase; aldolase; kinase (3); synthase; dehydrogenase; oxidase; hydratase (2); arginine amidinase; transaminase; glycolaldehydetransferase; equilase; kinase; lyase (2); kinase; 5-kinase; deaminase; dehydrogenase; transaminase; kinase; 3-kinase;hexokinase type IV glucokinase; phosphohexokinase; diphosphate synthase; ligase; 1-epimerase; synthase; phosphatase; acetyltransferase; hexose diphosphatase; adenylyltransferase; phosphatase; uridylyltransferase; dehydrogenase (phosphorylating); oxidase; decarboxylase; diphosphokinase;phosphogluconolactonase; dehydrogenase; geranyl-diphosphate synthase; isomerase (3); 4-phosphate cytidylyltransferase; O-methyltransferase; transaminase (3); hydratase; Delta-isomerase; hydratase; farnesyltransferase; ammonia-lyase; 4,6-dehydratase; dehydrogenase (NAD+); acid amidohydrolase; C-acetyltransferase; synthase; dehydrogenase; dehydrogenase; reductase (NADPH); dehydrogenase (NADP+-dependent, decarboxylating); dehydrogenase (NADP+); dehydrogenase (NAD+); dehydrogenase (NADP+); (alpha-D-glucose-1,6-bisphosphate-dependent); mutase; synthase; reductase; (Si)-synthase; dehydrogenase; dehydrogenase (succinyl-transferring); dehydrogenase (acetyl-transferring); cyclohydrolase; kinase |
| **Immune system** | **2** |  |
| T cell receptor signaling pathway | 2 | phosphatase; protein-tyrosine kinase |
