# Supplementary material for: Transcriptomic analysis of leukocyte immunometabolic dynamics in hemorrhagic sepsis in Piaractus mesopotamicus
Source: Research Square preprint supplement (doi:10.21203/rs.3.rs-6959903/v1), 2025-06-30
Supplement: Supplementary file 2 [file f45d63c040e3ca9bc100e4e1.docx]

**Supplementary Table S1** – Differential expression of selected immune-related genes in leukocytes of *Piaractus mesopotamicus* in response to *Aeromonas hydrophila* infection across different time points.

|  |  |  | **Controlx1h** |  |  |  | **Controlx3h** |  |  |
| --- | --- | --- | --- | --- | --- | --- | --- | --- | --- |
|  | **Category and gene name** | **logFC** | **Diff** | **PValue** | **FDR** | **logFC** | **Diff** | **PValue** | **FDR** |
| Locus_52703.0_Transcript_1_0_Thrombopoietin_receptor | Thrombopoietin_receptor | 0,0351 | Up | 0,067 | 0,3012 | 0,877 | Up | 0 | 0.0015 |
| Locus_44135.0_Transcript_1_0_Thyroid_hormone_receptor_beta | Thyroid_hormone | 0,727 | Up | 0,002 | 0.0352 | 0,991 | Up | 0 | 0.0008 |
| Locus_60878.2_Transcript_10_0_Class_I_histocompatibility_antigen_F10_alpha_chain | Histocompatibility | 0,63 | Up | 0,028 |  | 1,033 | Up | 0,007 | 0.0373 |
| Locus_60143.0_Transcript_8_0_Interferon_regulatory_factor_3 | Interferon | -0,972 | Down | 0,001 | 0.0230 | -0,995 | Down | 0,007 | 0.0368 |
| Locus_58872.0_Transcript_16_0_Tumor_necrosis_factor_receptor_superfamily_member_6 | Tumor_necrosis_factor | -0,6 | Down | 0,003 | 0.0409 | -0,213 | Down | 0,33 | 0 |
| Locus_29796.0_Transcript_1_0_Lymphocyte-specific_protein_1 | Lymphocyte | 0,481 | Up | 0,012 | 0 | 0,399 | Up | 0,056 | 0.0193 |
| Locus_60878.2_Transcript_13_0_T-cell_surface_glycoprotein_CD1b4 | T-cell | 0,557 | Up | 0013 | 0 | 1,038 | Up | 0,001 | 0.0094 |
| Locus_56682.1_Transcript_3_0_B-cell_linker_protein | B-cell | -0,873 | Down | 0 | 0.0094 | 0,168 | Up | 0,514 | 0 |
| Locus_57483.1_Transcript_16_0_ERO1-like_protein_beta | ERO(ERO1-like_protein) | 1,063 | Up | 0 | 0.0022 | 1,056 | Up | 0 | 0.0001 |
| Locus_59631.0_Transcript_15_0_Scavenger_receptor_class_B_member_1 | Scavenger  (_receptor_class_B_member_1) | 0,525 | Up | 0,028 | 0.0014 | 0,98 | Up | 0 | 0.0008 |
| Locus_54454.0_Transcript_1_0_Leukocyte_cell-derived_chemotaxin-2 | Leukocyte (CD) | 0,854 | Up | 0,033 | 0.0204 | 1,865 | Up | 0 | 0 |
| Locus_56518.1_Transcript_11_0_Integrin_beta-1-binding_protein_1 | Integrin | -0,581 | Down | 0,028 | 0.001 | -0,861 | Down | 0,001 | 0.001 |
| Locus_24527.0_Transcript_1_0_Interleukin-7_receptor_subunit_alpha | Interleukin | -1,225 | Down | 0 | 0.0008 | -1,811 | Down | 0 | 0 |
| Locus_18778.0_Transcript_1_0_CD9_antigen | CD9_antigen | -0,963 | Down | 0 | 0.0030 | -1,862 | Down | 0 | 0 |
| Locus_61142.2_Transcript_16_0_Coagulation_factor_IXa_heavy_chain_Flags | Coagulation | 0,748 | Up | 0 | 0.0038 | 0,927 | Up | 0 | 0.0002 |
| Locus_60220.1_Transcript_21_0_TNF_receptor-associated_factor_2 | TNF_receptor | -0,873 | Down | 0,001 | 0.0132 | 0,185 | Up | 0,474 | 0.001 |
| Locus_57579.0_Transcript_1_0_Leukotriene_B4_receptor_1 | Leukotriene | 1,7 | Up | 0 | 0 | 3,213 | Up | 0 | 0 |
| Locus_57347.1_Transcript_1_0_Heat_shock_cognate_71_kDa_protein | Heat_shock | 0,905 | Up | 0 | 0.0014 | 0,175 | Up | 0,512 | 0 |
| Locus_58137.2_Transcript_6_0_Glucocorticoid_receptor | Glucocorticoid_receptor | 0,591 | Up | 0,003 | 0.0433 | 0,858 | Up | 0 | 0.0016 |
| Locus_59653.1_Transcript_3_0_Prostaglandin_E2_receptor_EP3_subtype | Prostaglandin | 1,633 | Up | 0 | 0 | 2,519 | Up | 0 | 0 |
| Locus_41439.0_Transcript_2_0_TGF-beta_receptor_type-1 | TGF-beta | 0,643 | Up | 0,038 | 0.042 | 0,647 | Up | 0,044 | 0.0015 |
| Locus_27596.0_Transcript_2_0_Thromboxane_A2_receptor | Thromboxane | 0,183 | Up | 0,497 | 0 | 0,709 | Up | 0,002 | 0.0161 |
| Locus_60266.0_Transcript_3_0_Myeloid_differentiation_primary_response_protein_MyD88 | MyD88(Myeloid_differentiation_  primary_response_protein_MyD88) | 0,618 | Up | 0,002 | 0.0297 | 0,593 | Up | 0,002 | 0.0159 |
| Locus_57461.1_Transcript_4_0_Insulin_receptor_subunit_beta_Flags | Insulin | 0,761 | Up | 0,002 | 0.0280 | 0,752 | Up | 0,004 | 0.0238 |
| Locus_27749.0_Transcript_2_0_Immunoglobulin_superfamily_member_8 | Immunoglobulin | -0,74 | Down | 0,003 | 0.0422 | -0,582 | Down | 0,01 | 0.0238 |
| Locus_55533.2_Transcript_2_0_Toll-interacting_protein | Toll-interacting | -0,05 | Down | 0,785 | 0 | -0,769 | Down | 0 | 0.0018 |
| Locus_55444.0_Transcript_1_0_Complement_C3c_alpha_chain_fragment_2 | Complement | -2,428 | Down | 0 | 0.0091 | -1,606 | Down | 0,003 | 0.0193 |
| Locus_57869.1_Transcript_8_0_Leukocyte_receptor_cluster_member_8_homolog | Leukocyte | 1,17 | Up | 0 | 0.0059 | 0,359 | Up | 0,275 | 0 |
| Locus_58469.4_Transcript_7_0_L-selectin | Selectin (L-Selectin) | 0,658 | Up | 0,037 | 0 | 0,889 | Up | 0,006 | 0.0355 |
| Locus_59046.5_Transcript_1_0_C5a_anaphylatoxin_chemotactic_receptor | Anaphylatoxin | 1,595 | Up | 0 | 0.0005 | 3,508 | Up | 0 | 0 |
| Locus_57059.0_Transcript_2_0_C-X-C_chemokine_receptor_type_4 | C-X-C (Chemokine) | 0,842 | Up | 0 | 0.0044 | 0,089 | Up | 0,7 | 0.0001 |
| Locus_52516.1_Transcript_1_0_Cytokine_receptor-like_factor_1 | Cytokine | 0,915 | Up | 0,002 | 0.0326 | 2,199 | Up | 0 | 0 |
| Locus_56988.0_Transcript_2_0_Dedicator_of_cytokinesis_protein_2 | Cytokinesis | -1,031 | Down | 0 | 0.0008 | -1,294 | Down | 0 | 0 |
| Locus_25491.0_Transcript_1_0_NF-kappa-B_inhibitor_alpha | Kappa (NF-Kappa-Beta) | -0,643 | Down | 0,002 | 0.0302 | 1,114 | Down | 0 | 0 |
| Locus_54835.0_Transcript_1_0_Transferrin_receptor_protein_1 | Transferrin receptor 1a | 1,116 | Up | 0 | 0.0008 | 1,319 | Up | 0 | 0 |
| Locus_56457.0_Transcript_1_0_Lysozyme_C | Lysozyme | 0,62 | Up | 0,154 | 0 | 0,742 | Up | 0,046 | 0.0300 |
| Locus_53659.0_Transcript_1_0_Macrophage-expressed_gene_1_protein | Macrophage | -1,131 | Down | 0 | 0.0049 | -0,791 | Down | 0,006 | 0.0331 |
| Locus_46889.0_Transcript_1_0_Neutrophil_cytosol_factor_4 | Neutrophil | -0,368 | Down | 0,344 | 0.0036 | 0,987 | Up | 0,004 | 0.0240 |
| Locus_56042.0_Transcript_8_0_Chemokine-like_receptor_1 | Chemokine-like |  |  |  |  | 0,564 | Up | 0,14 |  |
| Locus_56396.0_Transcript_1_0_Granulocyte_colony-stimulating_factor_receptor | Granulocyte | 0,423 | Up | 0,263 | 0,037 | -0,575 | Down | 0,127 | 0,0361 |
| Locus_54859.1_Transcript_4_0_Oxidoreductase_NAD-binding_domain-containing_protein_1 | Oxidoreductase | -0,713 | Down | 0,001 | 0.0131 | -0,439 | Down | 0,047 | 0 |
| Locus_58889.0_Transcript_3_0_Catalase | Catalase | -0,06 | Down | 0,806 | 0 | -0,086 | Down | 0,748 | 0 |
| Locus_51739.0_Transcript_8_0_Glutathione_peroxidase_3 | Glutathione | 1,543 | Up | 0 | 0.0001 | 2,112 | Up | 0 | 0 |
|  |  |  | **Controlx6h** |  |  |  | **Controlx9h** |  |  |
|  | **Category and gene name** | **logFC** | **Diff** | **PValue** | **FDR** | **logFC** | **Diff** | **PValue** | **FDR** |
| Locus_52703.0_Transcript_1_0_Thrombopoietin_receptor | Thrombopoietin_receptor | 0,0819 | Up | 0,7047 | 0 | -1,0329 | Down | 0,0008 | 0.0091 |
| Locus_44135.0_Transcript_1_0_Thyroid_hormone_receptor_beta | Thyroid_hormone | 0,9769 | Up | 0,0013 | 0.0225 | 0,7418 | Up | 0,0047 | 0.0338 |
| Locus_60878.2_Transcript_10_0_Class_I_histocompatibility_antigen_F10_alpha_chain | Histocompatibility | 0,3897 | Up | 0,2031 | 0.0002 | 0,3828 | Up | 0,222 | 0 |
| Locus_60143.0_Transcript_8_0_Interferon_regulatory_factor_3 | Interferon | -0,6548 | Down | 0,0504 | 0 | -1,0705 | Down | 0,0011 | 0.0109 |
| Locus_58872.0_Transcript_16_0_Tumor_necrosis_factor_receptor_superfamily_member_6 | Tumor_necrosis_factor | -0,3256 | Down | 0,1362 | 0 | -0,3905 | Down | 0,068 | 0.0084 |
| Locus_29796.0_Transcript_1_0_Lymphocyte-specific_protein_1 | Lymphocyte | 0,2291 | Up | 0,2966 | 0.0001 | 0,3558 | Up | 0,0874 | 0.0003 |
| Locus_60878.2_Transcript_13_0_T-cell_surface_glycoprotein_CD1b4 | T-cell | 0,434 | Up | 0,0793 | 0 | 0,2642 | Up | 0,3303 | 0 |
| Locus_56682.1_Transcript_3_0_B-cell_linker_protein | B-cell | -0,2349 | Down | 0,4545 | 0 | -0,5713 | Down | 0,0148 | 0 |
| Locus_57483.1_Transcript_16_0_ERO1-like_protein_beta | ERO(ERO1-like_protein) | 1,0875 | Up | 0,0002 | 0.0054 | 0,8201 | Up | 0,0004 | 0.0047 |
| Locus_59631.0_Transcript_15_0_Scavenger_receptor_class_B_member_1 | Scavenger  (_receptor_class_B_member_1) | 0,3863 | Up | 0,1795 | 0.0132 | 0,1548 | Up | 0,5252 | 0.0012 |
| Locus_54454.0_Transcript_1_0_Leukocyte_cell-derived_chemotaxin-2 | Leukocyte (CD) | 1,8858 | Up | 0 | 0.0015 | 0,5156 | Up | 0,1528 | 0.0024 |
| Locus_56518.1_Transcript_11_0_Integrin_beta-1-binding_protein_1 | Integrin | -0,4899 | Down | 0,0702 | 0.0087 | -0,4595 | Down | 0,0822 | 0 |
| Locus_24527.0_Transcript_1_0_Interleukin-7_receptor_subunit_alpha | Interleukin | -1,9256 | Down | 0,0009 | 0.0174 | -3,4526 | Down | 0 | 0 |
| Locus_18778.0_Transcript_1_0_CD9_antigen | CD9_antigen | -0,9803 | Down | 0,0245 | 0.0035 | -1,9481 | Down | 0 | 0 |
| Locus_61142.2_Transcript_16_0_Coagulation_factor_IXa_heavy_chain_Flags | Coagulation | 0,3303 | Up | 0,1211 | 0.1652 | 0,4836 | Up | 0,0203 | 0.001 |
| Locus_60220.1_Transcript_21_0_TNF_receptor-associated_factor_2 | TNF_receptor | -0,1344 | Down | 0,6208 | 0 | -0,3108 | Down | 0,226 | 0 |
| Locus_57579.0_Transcript_1_0_Leukotriene_B4_receptor_1 | Leukotriene | 2,709 | Up | 0 | 0 | 2,4493 | Up | 0 | 0 |
| Locus_57347.1_Transcript_1_0_Heat_shock_cognate_71_kDa_protein | Heat_shock | 0,6965 | Up | 0,0039 | 0.047 | 0,4083 | Up | 0,0632 | 0 |
| Locus_58137.2_Transcript_6_0_Glucocorticoid_receptor | Glucocorticoid_receptor | 0,7439 | Up | 0,0018 | 0.0283 | 0,8505 | Up | 0 | 0.0008 |
| Locus_59653.1_Transcript_3_0_Prostaglandin_E2_receptor_EP3_subtype | Prostaglandin | 1,8402 | Up | 0 | 0 | 2,1777 | Up | 0 | 0 |
| Locus_41439.0_Transcript_2_0_TGF-beta_receptor_type-1 | TGF-beta | 1,1064 | Up | 0,0015 | 0.0246 | 1,3162 | Up | 0 | 0.0004 |
| Locus_27596.0_Transcript_2_0_Thromboxane_A2_receptor | Thromboxane | 0,6422 | Up | 0,0192 | 0.0037 | -0,0571 | Down | 0,8689 | 0 |
| Locus_60266.0_Transcript_11_0_Myeloid_differentiation_primary_response_protein_MyD88 | MyD88(Myeloid_differentiation_  primary_response_protein_MyD88) | -0,1279 | Down | 0,5558 | 0 | -0,0286 | Down | 0,8757 | 0.0012 |
| Locus_57461.1_Transcript_4_0_Insulin_receptor_subunit_beta_Flags | Insulin | 0,5846 | Up | 0,0791 | 0.0031 | 0,6919 | Up | 0,0082 | 0.0002 |
| Locus_27749.0_Transcript_2_0_Immunoglobulin_superfamily_member_8 | Immunoglobulin | -1,1454 | Down | 0,0003 | 0 | -1,6942 | Down | 0 | 0 |
| Locus_55533.2_Transcript_2_0_Toll-interacting_protein | Toll-interacting | 0,2301 | Up | 0,2829 | 0.0013 | 0,0364 | Up | 0,8444 | 0.0012 |
| Locus_55444.0_Transcript_1_0_Complement_C3c_alpha_chain_fragment_2 | Complement | -1,5719 | Down | 0,0248 | 0 | -0,701 | Down | 0,3859 | 0 |
| Locus_57869.1_Transcript_8_0_Leukocyte_receptor_cluster_member_8_homolog | Leukocyte | 0,3524 | Up | 0,3291 | 0 | 0,4378 | Up | 0,1802 | 0 |
| Locus_58469.4_Transcript_7_0_L-selectin | Selectin (L-Selectin) | 0,6176 | Up | 0,0731 | 0.315 | 0,3666 | Up | 0,2967 | 0.014 |
| Locus_59046.5_Transcript_1_0_C5a_anaphylatoxin_chemotactic_receptor | Anaphylatoxin | 3,0893 | Up | 0 | 0 | 2,2082 | Up | 0 | 0 |
| Locus_57059.0_Transcript_2_0_C-X-C_chemokine_receptor_type_4 | C-X-C (Chemokine) | 0,0506 | Up | 0,8783 | 0 | 0,0568 | Up | 0,8061 | 0 |
| Locus_52516.1_Transcript_1_0_Cytokine_receptor-like_factor_1 | Cytokine | 1,2033 | Up | 0,0002 | 0.0051 | 1,2956 | Up | 0 | 0 |
| Locus_56988.0_Transcript_2_0_Dedicator_of_cytokinesis_protein_2 | Cytokinesis | -0,68 | Down | 0,2008 | 0 | -1,8505 | Down | 0 | 0 |
| Locus_25491.0_Transcript_1_0_NF-kappa-B_inhibitor_alpha | Kappa (NF-Kappa-Beta) | 0,9975 | Up | 0,0001 | 0.0033 | 1,1773 | Up | 0 | 0.0001 |
| Locus_54835.0_Transcript_1_0_Transferrin_receptor_protein_1 | Transferrin receptor 1a | 1,2859 | Up | 0 | 0 | 0,9736 | Up | 0 | 0.0008 |
| Locus_56457.0_Transcript_1_0_Lysozyme_C | Lysozyme | 2,2886 | Up | 0,002 | 0.024 | 0,16 | Up | 0,732 | 0.001 |
| Locus_53659.0_Transcript_1_0_Macrophage-expressed_gene_1_protein | Macrophage | -0,7423 | Down | 0,1433 | 0 | -2,3127 | Down | 0 | 0 |
| Locus_46889.0_Transcript_1_0_Neutrophil_cytosol_factor_4 | Neutrophil | 2,0296 | Up | 0,0001 | 0.0030 | 1,3158 | Up | 0,0001 | 0.0012 |
| Locus_56042.0_Transcript_8_0_Chemokine-like_receptor_1 | Chemokine-like | 1,1717 | Up | 0,0144 | 0.0033 | 0,9939 | Up | 0,0014 | 0.0134 |
| Locus_56396.0_Transcript_1_0_Granulocyte_colony-stimulating_factor_receptor | Granulocyte | 1,1294 | Up | 0,0721 | 0 | -0,3908 | Down | 0,3602 | 0.0001 |
| Locus_54859.1_Transcript_4_0_Oxidoreductase_NAD-binding_domain-containing_protein_1 | Oxidoreductase | -0,7398 | Down | 0,0012 | 0.0205 | -0,6772 | Down | 0,0013 | 0.0124 |
| Locus_58889.0_Transcript_3_0_Catalase | Catalase | 0,1916 | Up | 0,4918 | 0.047 | 0,2423 | Up | 0,3549 | 0.0023 |
| Locus_51739.0_Transcript_8_0_Glutathione_peroxidase_3 | Glutathione | 1,8677 | Up | 0 | 0 | 0,6878 | Up | 0,0003 | 0.0002 |

Differential expression is presented as log *Fold Change (logFC)*, indicating the intensity of regulation (positive or negative). Genes are categorized by function, including immune receptors, cytokines, inflammatory and metabolic factors. Genes with *positive logFC* (Up) indicate *upregulation* and genes with *negative logFC* (Down) indicate *downregulation*.
