# Supplementary material for: Transcriptomic analysis of leukocyte immunometabolic dynamics in hemorrhagic sepsis in Piaractus mesopotamicus
Source: Research Square preprint supplement (doi:10.21203/rs.3.rs-6959903/v1), 2025-06-30
Supplement: Supplementary file 3 [file f5e64da9187a16c779aefdf0.docx]

**Supplementary Table S3** – Enriched Gene Ontology (GO) terms by category (BP, MF, CC) and time point (1h, 3h, 6h, 9h), with corresponding FDR and P-values.

|  |  | **Controlx1h** |  |
| --- | --- | --- | --- |
| **Term GO** | **Category** | **FDR** | **P-Value** |
| antigen processing and presentation of endogenous peptide antigen via MHC class I | BP | 5.27x10-5 | 3.06x10-7 |
| ATP binding | MF | 6.98x10-3 | 1.06x10-4 |
| cleavage in ITS2 between 5.8S rRNA and LSU-rRNA of tricistronic rRNA transcript (SSU-rRNA, 5.8S rRNA, LSU-rRNA) | BP | 3.08x10-4 | 2.91x10-6 |
| cytoplasmic exosome (RNase complex) | CC | 3.08x10-4 | 2.87x10-6 |
| exocrine pancreas development | BP | 9.87x10-3 | 1.69x10-4 |
| glutamate-tRNA ligase activity | MF | 1.38x10-4 | 1.03x10-6 |
| glutamyl-tRNA aminoacylation | BP | 1.38x10-4 | 1.04x10-6 |
| glycine-tRNA ligase activity | MF | 6.98x10-3 | 1.09x10-4 |
| glycyl-tRNA aminoacylation | BP | 6.98x10-3 | 1.09x10-4 |
| histone arginine methylation | BP | 3.61x10-5 | 1.86x10-7 |
| histone-arginine N-methyltransferase activity | MF | 1.39x10-3 | 1.76x10-5 |
| inorganic phosphate transmembrane transporter activity | MF | 9.29x10-4 | 1.11x10-5 |
| lamin filament | CC | 2.09x10-5 | 9.65x10-8 |
| metalloaminopeptidase activity | MF | 3.61x10-5 | 1.86x10-7 |
| neural retina development | BP | 9.26x10-3 | 1.52x10-4 |
| nucleosome | CC | 1.19x10-4 | 8.1x10-7 |
| nucleosome binding | MF | 3.76x10-4 | 3.69x10-6 |
| NURF complex | CC | 1.23x10-4 | 8.59x10-7 |
| peptide binding | MF | 9.85x10-5 | 1.68x10-4 |
| peptide catabolic process | BP | 1.48x10-4 | 1.13x10-6 |
| phosphate ion transport | BP | 1.39x10-3 | 1.76x10-5 |
| phosphopyruvate hydratase activity | MF | 7.46x10-4 | 8.52x10-6 |
| phosphopyruvate hydratase complex | CC | 7.46x10-4 | 8.52x10-6 |
| phosphorylase activity | MF | 6.98x10-3 | 1.09x10-4 |
| positive regulation of angiogenesis | BP | 9.85x10-3 | 1.68x10-4 |
| preribosome, large subunit precursor | CC | 5.95x10-4 | 6.34x10-6 |
| proline-tRNA ligase activity | MF | 3.61x10-5 | 1.92x10-7 |
| prolyl-tRNA aminoacylation | BP | 3.61x10-5 | 1.92x10-7 |
| Ran GTPase binding | MF | 6.70x10-7 | 2.21x10-9 |
| regulation of blood pressure | BP | 5.27x10-5 | 3.06x10-7 |
| regulation of exit from mitosis | BP | 2.26x10-4 | 1.89x10-6 |
| regulation of skeletal muscle fiber development | BP | 3.76x10-4 | 3.69x10-6 |
| SUMO activating enzyme activity | MF | 1.67x10-3 | 2.14x10-5 |
| translation release factor activity, codon specific | MF | 5.95x10-4 | 6.61x10-6 |
| tRNA (cytosine-5-)-methyltransferase activity | MF | 5.95x10-4 | 6.61x10-6 |
| tRNA (guanine-N1-)-methyltransferase activity | MF | 6.98x10-3 | 1.09x10-4 |
| tRNA (m1A) methyltransferase complex | CC | 3.08x10-4 | 2.91x10-6 |
| tRNA methylation | BP | 3.10x10-3 | 4.28x10-5 |
| tyrosine-tRNA ligase activity | MF | 4.67x10-3 | 6.7x10-5 |
| tyrosyl-tRNA aminoacylation | BP | 4.67x10-3 | 6.7x10-5 |
|  |  | **1h** |  |
| **Term GO** | **Category** | **FDR** | **P-Value** |
| alkylglycerone-phosphate synthase activity | MF | 1.65x10-3 | 4.63x10-6 |
| ATP-dependent peptidase activity | MF | 1.2x10-18 | 1.2x10-22 |
| bile acid binding | MF | 1.65x10-3 | 4.63x10-6 |
| bis(5'-nucleosyl)-tetraphosphatase activity | MF | 2.72x10-4 | 3x10-7 |
| calcitriol binding | MF | 1.65x10-3 | 4.63x10-6 |
| cyclin-dependent protein serine/threonine kinase inhibitor activity | MF | 2.27x10-5 | 9.1x10-9 |
| cyclin-dependent protein serine/threonine kinase regulator activity | MF | 2.41x10-3 | 7.24x10-6 |
| D3 vitamins binding | MF | 1.65x10-3 | 4.63x10-6 |
| diterpenoid metabolic process | BP | 7.65x10-3 | 4.52x10-5 |
| endosome to lysosome transport | BP | 2.76x10-3 | 9.14x10-5 |
| enzyme inhibitor activity | MF | 5.08x10-3 | 2.7x10-9 |
| FHF complex | CC | 4.44x10-3 | 2.31x10-5 |
| histone methyltransferase activity | MF | 2.68x10-3 | 8.58x10-6 |
| histone-lysine N-methyltransferase activity | MF | 1.64x10-3 | 3.44x10-6 |
| integral component of membrane | CC | 1.22x10-3 | 1.95x10-6 |
| intrinsic component of membrane | CC | 1.25x10-3 | 2.26x10-6 |
| kinase inhibitor activity | MF | 4.68x10-5 | 3.28x10-8 |
| lithocholic acid binding | MF | 1.65x10-3 | 4.63x10-6 |
| lysine N-methyltransferase activity | MF | 3.12x10-3 | 1.1x10-5 |
| lysosomal transport | BP | 8.15x10-3 | 5.14x10-5 |
| membrane | CC | 4.01x10-3 | 1.89x10-5 |
| membrane part | CC | 8.09x10-3 | 4.98x10-5 |
| molybdopterin cofactor biosynthetic process | BP | 3.88x10-3 | 1.59x10-5 |
| molybdopterin cofactor metabolic process | BP | 3.88x10-3 | 1.59x10-5 |
| molybdopterin synthase complex | CC | 2.75x10-4 | 3.31x10-7 |
| Mo-molybdopterin cofactor biosynthetic process | BP | 3.88x10-3 | 1.59x10-5 |
| Mo-molybdopterin cofactor metabolic process | BP | 3.88x10-3 | 1.59x10-5 |
| monooxygenase activity | MF | 8.09x10-3 | 5.02x10-5 |
| negative regulation of kinase activity | BP | 6.85x10-3 | 3.7x10-5 |
| negative regulation of protein kinase activity | BP | 4.44x10-3 | 2.27x10-5 |
| negative regulation of protein serine/threonine kinase activity | BP | 2.41x10-3 | 7.24x10-6 |
| neurotransmitter transporter activity | MF | 4.01x10-3 | 1.97x10-5 |
| neurotransmitter:sodium symporter activity | MF | 4.01x10-3 | 1.97x10-5 |
| nucleotide diphosphatase activity | MF | 1.25x10-3 | 2.25x10-6 |
| oxidoreductase activity, acting on paired donors, with incorporation or reduction of molecular oxygen, reduced pteridine as one donor, and incorporation of one atom of oxygen | MF | 4.01x10-3 | 1.83x10-5 |
| peptidyl-lysine dimethylation | BP | 1.29x10-7 | 3.89x10-11 |
| peptidyl-lysine methylation | BP | 4.01x10-3 | 1.75x10-5 |
| peptidyl-lysine monomethylation | BP | 1.29x10-7 | 3.89x10-11 |
| positive regulation of hematopoietic progenitor cell differentiation | BP | 4.01x10-3 | 1.83x10-5 |
| primary alcohol metabolic process | BP | 7.65x10-3 | 4.52x10-5 |
| prosthetic group metabolic process | BP | 3.88x10-3 | 1.59x10-5 |
| protein kinase inhibitor activity | MF | 4.68x10-5 | 3.28x10-8 |
| protein methyltransferase activity | MF | 4.3x10-3 | 2.15x10-5 |
| protein serine/threonine kinase inhibitor activity | MF | 3.58x10-5 | 1.79x10-8 |
| protein-lysine N-methyltransferase activity | MF | 3.12x10-3 | 1.09x10-5 |
| regulation of response to oxidative stress | BP | 1.15x10-4 | 1.15x10-7 |
| regulation of response to reactive oxygen species | BP | 5.31x10-5 | 4.26x10-8 |
| response to bacterium | BP | 2.68x10-6 | 8.51x10-6 |
| response to molecule of bacterial origin | BP | 8.96x10-4 | 1.26x10-6 |
| response to oxidative stress | BP | 1.49x10-3 | 2.98x10-6 |
| response to oxygen-containing compound | BP | 1.11x10-3 | 1.67x10-6 |
| retinoid metabolic process | BP | 7.65x10-3 | 4.52x10-5 |
| retinol metabolic process | BP | 4.01x10-3 | 1.83x10-5 |
| secondary active transmembrane transporter activity | MF | 1.35x10-3 | 2.57x10-6 |
| sodium ion transmembrane transporter activity | MF | 3.51x10-3 | 1.27x10-5 |
| solute:sodium symporter activity | MF | 7.28x10-3 | 4.01x10-5 |
| terpenoid metabolic process | BP | 8.64x10-4 | 1.12x10-6 |
| TIR domain binding | MF | 7.65x10-3 | 4.52x10-5 |
| transcription factor binding | MF | 4.01x10-3 | 1.90x10-5 |
| transmembrane transport | BP | 8.09x10-3 | 4.96x10-5 |
| vitamin D binding | MF | 1.65x10-3 | 4.63x10-6 |
| xenobiotic metabolic process | BP | 1.65x10-3 | 4.63x10-6 |
|  |  | **Controlx3h** |  |
| **Term GO** | **Category** | **FDR** | **P-Value** |
| cytoplasmic exosome (RNase complex) | CC | 1.56x10-5 | 2.33x10-8 |
| anion homeostasis | BP | 8.56x10-5 | 2.83x10-7 |
| ATP-dependent DNA helicase activity | MF | 0.000121501 | 4.72x10-7 |
| cellular anion homeostasis | BP | 8.56x10-5 | 2.83x10-7 |
| cellular divalent inorganic anion homeostasis | BP | 8.56x10-5 | 2.83x10-7 |
| cellular monovalent inorganic anion homeostasis | BP | 8.56x10-5 | 2.83x10-7 |
| cellular phosphate ion homeostasis | BP | 8.56x10-5 | 2.83x10-7 |
| cellular response to DNA damage stimulus | BP | 3.2x10-5 | 5.43x10-8 |
| cellular trivalent inorganic anion homeostasis | BP | 8.56x10-5 | 2.83x10-7 |
| chaperone mediated protein folding requiring cofactor | BP | 0.000391187 | 2.22x10-6 |
| chaperone-mediated protein folding | BP | 0.000545001 | 3.53x10-6 |
| chromatin assembly | BP | 0.000352029 | 1.79x10-6 |
| chromatin assembly or disassembly | BP | 8.11x10-5 | 1.62x10-7 |
| cleavage involved in rRNA processing | BP | 0.000193813 | 8.7x10-7 |
| coenzyme A biosynthetic process | BP | 0.000176047 | 7.2x10-7 |
| coenzyme A metabolic process | BP | 0.000518845 | 3.31x10-6 |
| cytosolic part | CC | 1.54x10-5 | 2.15x10-8 |
| 'de novo' posttranslational protein folding | BP | 0.000391187 | 2.22x10-6 |
| 'de novo' protein folding | BP | 0.000391187 | 2.22x10-6 |
| divalent inorganic anion homeostasis | BP | 8.56x10-5 | 2.83x10-7 |
| DNA conformation change | BP | 8.56x10-5 | 3.03x10-7 |
| DNA packaging complex | CC | 8.56x10-5 | 2.91x10-7 |
| DNA repair | BP | 2.75x10-7 | 1.92x10-10 |
| DNA-dependent ATPase activity | MF | 3.46x10-5 | 6.21x10-8 |
| gas transport | BP | 8.12x10-11 | 4.05x10-14 |
| glycerolipid catabolic process | BP | 0.00017757 | 7.61x10-7 |
| glycerophosphocholine phosphodiesterase activity | MF | 8.56x10-5 | 2.83x10-7 |
| glycerophospholipid catabolic process | BP | 8.56x10-5 | 2.83x10-7 |
| Golgi organization | BP | 8.13x10-5 | 1.7x10-7 |
| hemoglobin complex | CC | 2.51x10-11 | 1x10-14 |
| HOPS complex | CC | 0.00043138 | 2.49x10-6 |
| intracellular | CC | 0.000349021 | 1.6x10-6 |
| intracellular membrane-bounded organelle | CC | 1.6x10-7 | 9.59x10-11 |
| intracellular organelle | CC | 2.48x10-6 | 2.23x10-9 |
| intracellular part | CC | 0.000482093 | 3.03x10-6 |
| macromolecular complex | CC | 0.000103956 | 3.84x10-7 |
| maturation of 5.8S rRNA from tricistronic rRNA transcript (SSU-rRNA, 5.8S rRNA, LSU-rRNA) | BP | 0.000600403 | 3.95x10-6 |
| membrane-bounded organelle | CC | 6.53x10-7 | 5.21x10-10 |
| monovalent inorganic anion homeostasis | BP | 8.56x10-5 | 2.83x10-7 |
| ncRNA catabolic process | BP | 0.000352029 | 1.82x10-6 |
| nucleoside bisphosphate biosynthetic process | BP | 0.000352029 | 1.86x10-6 |
| nucleosome | CC | 6.8x10-5 | 1.29x10-7 |
| nucleosome assembly | BP | 0.000352029 | 1.79x10-6 |
| nucleosome organization | BP | 0.000150437 | 6x10-7 |
| nucleus | CC | 3.72x10-6 | 3.71x10-9 |
| organelle | CC | 4.06x10-6 | 4.45x10-9 |
| oxygen binding | MF | 2.51x10-11 | 1x10-14 |
| oxygen transport | BP | 2.51x10-11 | 1x10-14 |
| oxygen transporter activity | MF | 2.51x10-11 | 1x10-14 |
| pantothenate kinase activity | MF | 0.000846001 | 5.65x10-6 |
| pattern binding | MF | 0.000452851 | 2.71x10-6 |
| phosphate ion homeostasis | BP | 8.56x10-5 | 2.83x10-7 |
| polysaccharide binding | MF | 0.000452851 | 2.71x10-6 |
| protein complex | CC | 0.00017757 | 7.61x10-7 |
| protein-DNA complex | CC | 0.000477525 | 2.93x10-6 |
| purine nucleoside bisphosphate biosynthetic process | BP | 0.000352029 | 1.86x10-6 |
| retrograde vesicle-mediated transport, Golgi to ER | BP | 0.000185853 | 8.15x10-7 |
| ribonucleoprotein complex biogenesis | BP | 0.000999263 | 6.78x10-6 |
| ribonucleoside bisphosphate biosynthetic process | BP | 0.000352029 | 1.86x10-6 |
| ribosome biogenesis | BP | 1.49x10-5 | 1.93x10-8 |
| rRNA catabolic process | BP | 0.000352029 | 1.82x10-6 |
| rRNA metabolic process | BP | 8.56x10-5 | 3.07x10-7 |
| rRNA processing | BP | 1.63x10-5 | 2.6x10-8 |
| second spliceosomal transesterification activity | MF | 0.000391187 | 2.22x10-6 |
| starch binding | MF | 0.000121501 | 4.72x10-7 |
| tethering complex | CC | 1.23x10-5 | 1.47x10-8 |
| trivalent inorganic anion homeostasis | BP | 8.56x10-5 | 2.83x10-7 |
| vacuole fusion | BP | 0.000477525 | 2.95x10-6 |
|  |  | **3h** |  |
| **Term GO** | **Category** | **FDR** | **P-Value** |
| 1,2-dihydroxy-phenanthrene glycosyltransferase activity | MF | 0.0004391 | 7.27x10-6 |
| 1-phenanthrol glycosyltransferase activity | MF | 0.0004391 | 7.27x10-6 |
| 9-phenanthrol glycosyltransferase activity | MF | 0.0004391 | 7.27x10-6 |
| 9-phenanthrol UDP-glucuronosyltransferase activity | MF | 0.0004391 | 7.27x10-6 |
| active transmembrane transporter activity | MF | 2.74x10-8 | 1.28x10-10 |
| adenylyltransferase activity | MF | 4.82x10-20 | 5.77x10-23 |
| alcohol metabolic process | BP | 1.12x10-5 | 1.08x10-7 |
| alpha-(1->3)-fucosyltransferase activity | MF | 0.000954 | 1.85x10-5 |
| alpha-(1->6)-fucosyltransferase activity | MF | 8.87x10-6 | 8.05x10-8 |
| alpha-1,2-galactosyltransferase activity | MF | 0.0004391 | 7.27x10-6 |
| alpha-1,3-galactosyltransferase activity | MF | 0.0004391 | 7.27x10-6 |
| alpha-1,3-mannosyltransferase activity | MF | 0.0004391 | 7.27x10-6 |
| alpha-1,6-mannosyltransferase activity | MF | 0.0006765 | 1.18x10-5 |
| alternative mRNA splicing, via spliceosome | BP | 1.45x10-12 | 2.75x10-15 |
| amino acid transmembrane transporter activity | MF | 1.55x10-6 | 1.21x10-8 |
| amino acid transport | BP | 0.0004889 | 8.29x10-6 |
| anion transmembrane transporter activity | MF | 0.0001107 | 1.31x10-6 |
| apoptotic process | BP | 1.66x10-7 | 1.06x10-9 |
| ATPase activator activity | MF | 1.05x10-5 | 9.72x10-8 |
| ATPase regulator activity | MF | 1.45x10-5 | 1.46x10-7 |
| ATP-dependent peptidase activity | MF | 4.67x10-8 | 2.47x10-10 |
| benzoic acid glucosyltransferase activity | MF | 0.0004391 | 7.27x10-6 |
| beta-1,4-mannosyltransferase activity | MF | 0.0004391 | 7.27x10-6 |
| bis(5'-nucleosyl)-tetraphosphatase activity | MF | 0.000253 | 3.28x10-6 |
| BMP signaling pathway | BP | 9.05x10-8 | 5.42x10-10 |
| carbohydrate binding | MF | 0.0003359 | 4.59x10-6 |
| carboxylic acid binding | MF | 3.92x10-5 | 4.14x10-7 |
| carboxylic acid transmembrane transporter activity | MF | 8.58x10-6 | 7.7x10-8 |
| cation transmembrane transporter activity | MF | 4.48x10-11 | 9.39x10-14 |
| cell death | BP | 3.49x10-7 | 2.51x10-9 |
| cellular carbohydrate metabolic process | BP | 1.66x10-7 | 1.08x10-9 |
| cellular response to BMP stimulus | BP | 9.05x10-8 | 5.42x10-10 |
| cellular response to chemical stimulus | BP | 1.19x10-5 | 1.17x10-7 |
| cellular response to endogenous stimulus | BP | 1x10-8 | 4.29x10-11 |
| cellular response to growth factor stimulus | BP | 6.55x10-6 | 5.75x10-8 |
| cellular response to organic substance | BP | 6.55x10-6 | 5.68x10-8 |
| cellulose synthase activity | MF | 0.0004391 | 7.27x10-6 |
| chondroitin hydrolase activity | MF | 0.0004391 | 7.27x10-6 |
| cyclin-dependent protein serine/threonine kinase inhibitor activity | MF | 2.59x10-5 | 2.64x10-7 |
| cytokinin 9-beta-glucosyltransferase activity | MF | 0.0004391 | 7.27x10-6 |
| cytoplasmic translation | BP | 0.0008814 | 1.63x10-5 |
| diphosphoinositol-pentakisphosphate kinase activity | MF | 3.12x10-10 | 9.66x10-13 |
| DNA topoisomerase activity | MF | 0.000253 | 3.31x10-6 |
| DNA topoisomerase II activity | MF | 2.79x10-8 | 1.36x10-10 |
| DNA topoisomerase type I activity | MF | 5.81x10-5 | 6.66x10-7 |
| DNA topoisomerase type II (ATP-hydrolyzing) activity | MF | 2.79x10-8 | 1.36x10-10 |
| DNA topological change | BP | 0.000253 | 3.31x10-6 |
| dolichyl pyrophosphate Glc1Man9GlcNAc2 alpha-1,3-glucosyltransferase activity | MF | 0.0004391 | 7.27x10-6 |
| dolichyl pyrophosphate Man7GlcNAc2 alpha-1,3-glucosyltransferase activity | MF | 0.0004391 | 7.27x10-6 |
| dolichyl pyrophosphate Man9GlcNAc2 alpha-1,3-glucosyltransferase activity | MF | 0.0006765 | 1.18x10-5 |
| dolichyl-pyrophosphate Man7GlcNAc2 alpha-1,6-mannosyltransferase activity | MF | 0.0004391 | 7.27x10-6 |
| early endosome to late endosome transport | BP | 2.63x10-7 | 1.81x10-9 |
| endogalactosaminidase activity | MF | 0.0004391 | 7.27x10-6 |
| endopeptidase inhibitor activity | MF | 0.0008814 | 1.63x10-5 |
| endosome organization | BP | 2.41x10-6 | 1.94x10-8 |
| endosome to lysosome transport | BP | 1.29x10-9 | 4.75x10-12 |
| enzyme inhibitor activity | MF | 6.87x10-8 | 3.77x10-10 |
| enzyme linked receptor protein signaling pathway | BP | 0.000954 | 1.84x10-5 |
| face morphogenesis | BP | 1.06x10-5 | 1x10-7 |
| FHF complex | CC | 4.02x10-10 | 1.36x10-12 |
| FK506 binding | MF | 0.0009461 | 1.78x10-5 |
| fucosyltransferase activity | MF | 9.17x10-5 | 1.07x10-6 |
| galactosyltransferase activity | MF | 0.0008814 | 1.63x10-5 |
| gap junction | CC | 0.0001917 | 2.39x10-6 |
| glucuronosyltransferase activity | MF | 0.0007474 | 1.35x10-5 |
| head morphogenesis | BP | 0.0003179 | 4.28x10-6 |
| inactivation of MAPK activity | BP | 4.4x10-5 | 4.78x10-7 |
| indole-3-butyrate beta-glucosyltransferase activity | MF | 0.0004391 | 7.27x10-6 |
| inorganic cation transmembrane transporter activity | MF | 5.92x10-11 | 1.36x10-13 |
| inositol hexakisphosphate 5-kinase activity | MF | 3.12x10-10 | 9.66x10-13 |
| inositol hexakisphosphate kinase activity | MF | 3.12x10-10 | 9.66x10-13 |
| inositol metabolic process | BP | 6.11x10-9 | 2.56x10-11 |
| inositol phosphoceramide synthase activity | MF | 0.0004391 | 7.27x10-6 |
| inositol-1,3,4,5,6-pentakisphosphate kinase activity | MF | 3.12x10-10 | 9.66x10-13 |
| integral component of membrane | CC | 2.76x10-20 | 2.75x10-23 |
| integral component of plasma membrane | CC | 2.68x10-5 | 2.78x10-7 |
| intrinsic component of membrane | CC | 4.35x10-20 | 4.77x10-23 |
| intrinsic component of plasma membrane | CC | 0.0001783 | 2.2x10-6 |
| ion transmembrane transporter activity | MF | 5.13x10-11 | 1.13x10-13 |
| iron ion binding | MF | 0.0002674 | 3.52x10-6 |
| kinase inhibitor activity | MF | 5.93x10-6 | 5.03x10-8 |
| L-ascorbic acid binding | MF | 0.0005602 | 9.61x10-6 |
| lipopolysaccharide-1,5-galactosyltransferase activity | MF | 0.0004391 | 7.27x10-6 |
| lipopolysaccharide-1,6-galactosyltransferase activity | MF | 0.0004391 | 7.27x10-6 |
| lysosomal transport | BP | 1.51x10-7 | 9.48x10-10 |
| lysosome organization | BP | 1.12x10-5 | 1.1x10-7 |
| lytic vacuole organization | BP | 1.12x10-5 | 1.1x10-7 |
| macrolide binding | MF | 0.0009461 | 1.78x10-5 |
| MAP kinase phosphatase activity | MF | 0.0007341 | 1.32x10-5 |
| MAP kinase tyrosine/serine/threonine phosphatase activity | MF | 0.0007341 | 1.32x10-5 |
| membrane | CC | 5.81x10-19 | 7.53x10-22 |
| membrane part | CC | 4.62x10-17 | 6.91x10-20 |
| metal ion transmembrane transporter activity | MF | 1.4x10-18 | 1.96x10-21 |
| molecular transducer activity | MF | 7.37x10-8 | 4.19x10-10 |
| molybdopterin synthase complex | CC | 0.000954 | 1.85x10-5 |
| monosaccharide binding | MF | 0.0001277 | 1.54x10-6 |
| monovalent inorganic cation transmembrane transporter activity | MF | 1.63x10-10 | 4.38x10-13 |
| mRNA 3'-end processing | BP | 2.68x10-5 | 2.76x10-7 |
| mRNA polyadenylation | BP | 8.5x10-6 | 7.55x10-8 |
| negative regulation of catalytic activity | BP | 2.22x10-8 | 9.76x10-11 |
| negative regulation of kinase activity | BP | 5.08x10-7 | 3.8x10-9 |
| negative regulation of MAP kinase activity | BP | 0.0007341 | 1.32x10-5 |
| negative regulation of molecular function | BP | 1.36x10-6 | 1.04x10-8 |
| negative regulation of phosphate metabolic process | BP | 0.0004532 | 7.64x10-6 |
| negative regulation of phosphorus metabolic process | BP | 0.0004532 | 7.64x10-6 |
| negative regulation of phosphorylation | BP | 0.0002117 | 2.66x10-6 |
| negative regulation of plasminogen activation | BP | 0.00017 | 2.09x10-6 |
| negative regulation of protein kinase activity | BP | 1.48x10-7 | 9.18x10-10 |
| negative regulation of protein maturation | BP | 5.32x10-5 | 6.04x10-7 |
| negative regulation of protein phosphorylation | BP | 6.93x10-5 | 8.02x10-7 |
| negative regulation of protein processing | BP | 5.32x10-5 | 6.04x10-7 |
| negative regulation of protein serine/threonine kinase activity | BP | 6.11x10-9 | 2.56x10-11 |
| negative regulation of transferase activity | BP | 3.69x10-7 | 2.69x10-9 |
| neurotransmitter transport | BP | 5.53x10-22 | 3.86x10-25 |
| neurotransmitter transporter activity | MF | 7.45x10-26 | 1.49x10-29 |
| neurotransmitter:sodium symporter activity | MF | 7.45x10-26 | 1.49x10-29 |
| O antigen polymerase activity | MF | 0.0004391 | 7.27x10-6 |
| organic acid binding | MF | 3.92x10-5 | 4.14x10-7 |
| organic acid transmembrane transporter activity | MF | 1.17x10-7 | 7.1x10-10 |
| organic acid:sodium symporter activity | MF | 0.000954 | 1.85x10-5 |
| organic anion transmembrane transporter activity | MF | 3.25x10-7 | 2.27x10-9 |
| organic hydroxy compound metabolic process | BP | 0.0003583 | 4.93x10-6 |
| oxidoreductase activity, acting on paired donors, with incorporation or reduction of molecular oxygen | MF | 4.87x10-6 | 4.04x10-8 |
| p38MAPK cascade | BP | 4.12x10-16 | 6.99x10-19 |
| phenanthrol glycosyltransferase activity | MF | 0.0004391 | 7.27x10-6 |
| phosphotransferase activity, phosphate group as acceptor | MF | 0.0004532 | 7.64x10-6 |
| plasminogen activation | BP | 0.0004391 | 6.99x10-6 |
| polynucleotide adenylyltransferase activity | MF | 1.82x10-21 | 1.63x10-24 |
| polyol metabolic process | BP | 5.08x10-7 | 3.8x10-9 |
| positive regulation of ATPase activity | BP | 1.05x10-5 | 9.72x10-8 |
| positive regulation of BMP signaling pathway | BP | 8.29x10-11 | 2.07x10-13 |
| positive regulation of transmembrane receptor protein serine/threonine kinase signaling pathway | BP | 2.83x10-9 | 1.13x10-11 |
| programmed cell death | BP | 1.95x10-7 | 1.28x10-9 |
| protein kinase B signaling | BP | 3.98x10-5 | 4.28x10-7 |
| protein kinase inhibitor activity | MF | 5.93x10-6 | 5.03x10-8 |
| protein serine/threonine kinase inhibitor activity | MF | 5.32x10-5 | 6.04x10-7 |
| receptor activity | MF | 7.37x10-8 | 4.19x10-10 |
| regulation of alternative mRNA splicing, via spliceosome | BP | 8.42x10-13 | 1.51x10-15 |
| regulation of apoptotic process | BP | 0.0008814 | 1.6x10-5 |
| regulation of ATPase activity | BP | 1.45x10-5 | 1.46x10-7 |
| regulation of BMP signaling pathway | BP | 2.83x10-9 | 1.13x10-11 |
| regulation of cellular response to growth factor stimulus | BP | 2.37x10-7 | 1.59x10-9 |
| regulation of hematopoietic progenitor cell differentiation | BP | 0.0007341 | 1.32x10-5 |
| regulation of MAPK cascade | BP | 2.06x10-6 | 1.65x10-8 |
| regulation of mRNA metabolic process | BP | 6.03x10-7 | 4.57x10-9 |
| regulation of mRNA processing | BP | 4.06x10-10 | 1.42x10-12 |
| regulation of mRNA splicing, via spliceosome | BP | 1.58x10-10 | 4.1x10-13 |
| regulation of p38MAPK cascade | BP | 4.12x10-16 | 6.99x10-19 |
| regulation of plasminogen activation | BP | 0.00017 | 2.09x10-6 |
| regulation of programmed cell death | BP | 0.0009056 | 1.69x10-5 |
| regulation of protein kinase B signaling | BP | 3.98x10-5 | 4.28x10-7 |
| regulation of protein maturation | BP | 5.32x10-5 | 6.04x10-7 |
| regulation of protein processing | BP | 5.32x10-5 | 6.04x10-7 |
| regulation of RNA splicing | BP | 5.31x10-8 | 2.86x10-10 |
| regulation of stress-activated MAPK cascade | BP | 3.6x10-10 | 1.19x10-12 |
| regulation of stress-activated protein kinase signaling cascade | BP | 3.6x10-10 | 1.19x10-12 |
| regulation of transmembrane receptor protein serine/threonine kinase signaling pathway | BP | 2.06x10-6 | 1.63x10-8 |
| response to BMP | BP | 9.05x10-8 | 5.42x10-10 |
| response to endogenous stimulus | BP | 2.56x10-8 | 1.18x10-10 |
| response to growth factor | BP | 6.52x10-6 | 5.75x10-8 |
| response to lipid | BP | 0.0009056 | 1.69x10-5 |
| response to organic substance | BP | 0.0002764 | 3.67x10-6 |
| RNA 3'-end processing | BP | 6.75x10-10 | 2.42x10-12 |
| RNA polyadenylation | BP | 7.4x10-12 | 1.48x10-14 |
| salicylic acid glucosyltransferase (ester-forming) activity | MF | 0.0004391 | 7.27x10-6 |
| salicylic acid glucosyltransferase (glucoside-forming) activity | MF | 0.0004391 | 7.27x10-6 |
| secondary active transmembrane transporter activity | MF | 6.53x10-22 | 5.21x10-25 |
| serine-type endopeptidase inhibitor activity | MF | 0.000253 | 3.28x10-6 |
| signaling receptor activity | MF | 4.55x10-8 | 2.36x10-10 |
| single-organism process | BP | 0.0001024 | 1.2x10-6 |
| sodium ion transmembrane transporter activity | MF | 4.64x10-22 | 2.31x10-25 |
| solute:cation symporter activity | MF | 5.53x10-22 | 3.79x10-25 |
| solute:sodium symporter activity | MF | 4.96x10-24 | 1.48x10-27 |
| steroid binding | MF | 0.0003179 | 4.28x10-6 |
| steroid hormone receptor activity | MF | 0.0003256 | 4.42x10-6 |
| stress-activated MAPK cascade | BP | 3.24x10-8 | 1.65x10-10 |
| stress-activated protein kinase signaling cascade | BP | 3.24x10-8 | 1.65x10-10 |
| substrate-specific transmembrane transporter activity | MF | 6.89x10-11 | 1.65x10-13 |
| substrate-specific transporter activity | MF | 3.29x10-7 | 2.33x10-9 |
| symporter activity | MF | 1.91x10-22 | 7.62x10-26 |
| thrombocyte differentiation | BP | 0.0007341 | 1.32x10-5 |
| translesion synthesis | BP | 0.000253 | 3.28x10-6 |
| transmembrane receptor activity | MF | 0.0006765 | 1.18x10-5 |
| transmembrane receptor protein serine/threonine kinase signaling pathway | BP | 0.0004921 | 8.39x10-6 |
| transmembrane signaling receptor activity | MF | 0.0009512 | 1.8x10-5 |
| transmembrane transport | BP | 1.88x10-9 | 7.12x10-12 |
| transmembrane transporter activity | MF | 2.35x10-8 | 1.05x10-10 |
| transporter activity | MF | 1.06x10-5 | 9.91x10-8 |
| vesicle-mediated transport between endosomal compartments | BP | 2.63x10-7 | 1.81x10-9 |
| vitamin binding | MF | 4.82x10-6 | 3.94x10-8 |
| wybutosine biosynthetic process | BP | 0.0003925 | 5.48x10-6 |
| wybutosine metabolic process | BP | 0.0003925 | 5.48x10-6 |
| zeta DNA polymerase complex | CC | 0.0001145 | 1.37x10-6 |
| zymogen activation | BP | 0.0004391 | 6.99x10-6 |
|  |  | **Controlx6h** |  |
| **Term GO** | **Category** | **FDR** | **P-Value** |
| active transmembrane transporter activity | MF | 7.13x10-5 | 2.42x10-7 |
| cAMP-dependent protein kinase complex | CC | 0.000499555 | 2.09x10-6 |
| cAMP-dependent protein kinase regulator activity | MF | 0.000499555 | 2.09x10-6 |
| cell cycle G1/S phase transition | BP | 1.26x10-7 | 2.89x10-10 |
| cellular aldehyde metabolic process | BP | 6.46x10-5 | 2.13x10-7 |
| chaperone mediated protein folding requiring cofactor | BP | 0.000562125 | 2.52x10-6 |
| chaperone-mediated protein folding | BP | 0.000821526 | 4.10x10-6 |
| cyclin binding | MF | 7.47x10-12 | 7.45x10-16 |
| 'de novo' posttranslational protein folding | BP | 0.000562125 | 2.52x10-6 |
| 'de novo' protein folding | BP | 0.000562125 | 2.52x10-6 |
| DUBm complex | CC | 0.000821526 | 4.10x10-6 |
| G1 DNA damage checkpoint | BP | 1.52x10-10 | 1.51x10-13 |
| G1/S transition of mitotic cell cycle | BP | 1.26x10-7 | 2.89x10-10 |
| gas transport | BP | 9.38x10-11 | 5.62x10-14 |
| glucose 6-phosphate metabolic process | BP | 1.62x10-8 | 3.38x10-11 |
| glucose metabolic process | BP | 1.29x10-5 | 3.86x10-8 |
| glucose-6-phosphate dehydrogenase activity | MF | 7.25x10-10 | 7.95x10-13 |
| glyceraldehyde-3-phosphate metabolic process | BP | 1.62x10-8 | 3.38x10-11 |
| glycosphingolipid metabolic process | BP | 0.000728161 | 3.34x10-6 |
| heme binding | MF | 0.000499555 | 2.103x10-6 |
| hemoglobin complex | CC | 2.79x10-11 | 1.39x10-14 |
| hydrolase activity, acting on acid anhydrides, catalyzing transmembrane movement of substances | MF | 0.000821526 | 4.03x10-6 |
| hydro-lyase activity | MF | 0.000263909 | 1.03x10-6 |
| mitotic cell cycle checkpoint | BP | 3.89x10-5 | 1.20x10-7 |
| mitotic DNA damage checkpoint | BP | 2.73x10-9 | 3.81x10-12 |
| mitotic DNA integrity checkpoint | BP | 1.06x10-8 | 1.91x10-11 |
| mitotic G1 DNA damage checkpoint | BP | 1.52x10-10 | 1.52x10-13 |
| mitotic G1/S transition checkpoint | BP | 1.52x10-10 | 1.52x10-13 |
| NADP binding | MF | 4.47x10-6 | 1.20x10-8 |
| NADP metabolic process | BP | 2.14x10-7 | 5.12x10-10 |
| negative regulation of cell cycle G1/S phase transition | BP | 2.73x10-9 | 3.81x10-12 |
| negative regulation of cell cycle phase transition | BP | 9.9x10-6 | 2.86x10-8 |
| negative regulation of cell cycle process | BP | 0.000865413 | 4.40x10-6 |
| negative regulation of G1/S transition of mitotic cell cycle | BP | 2.73x10-9 | 3.81x10-12 |
| negative regulation of mitotic cell cycle | BP | 0.000799304 | 3.75x10-6 |
| negative regulation of mitotic cell cycle phase transition | BP | 9.9x10-6 | 2.86x10-8 |
| oxygen binding | MF | 2.79x10-11 | 1.39x10-14 |
| oxygen transport | BP | 2.79x10-11 | 1.39x10-14 |
| oxygen transporter activity | MF | 2.79x10-11 | 1.39x10-14 |
| pentose-phosphate shunt | BP | 1.62x10-8 | 3.38x10-11 |
| phosphatidic acid transporter activity | MF | 4.92x10-5 | 1.57x10-7 |
| P-P-bond-hydrolysis-driven transmembrane transporter activity | MF | 0.000180352 | 6.47x10-7 |
| primary active transmembrane transporter activity | MF | 0.000180352 | 6.47x10-7 |
| regulation of cell cycle G1/S phase transition | BP | 1.06x10-8 | 1.91x10-11 |
| regulation of cell cycle phase transition | BP | 0.000216829 | 8.22x10-7 |
| regulation of G1/S transition of mitotic cell cycle | BP | 1.06x10-8 | 1.91x10-11 |
| regulation of mitotic cell cycle phase transition | BP | 0.000216829 | 8.22x10-7 |
| SCF ubiquitin ligase complex | CC | 1.02x10-10 | 7.15x10-14 |
| SCF-dependent proteasomal ubiquitin-dependent protein catabolic process | BP | 4.46x10-9 | 6.67x10-12 |
| selenocysteinyl-tRNA(Sec) biosynthetic process | BP | 8.4x10-7 | 2.18x10-9 |
| transferase activity, transferring selenium-containing groups | MF | 8.4x10-7 | 2.18x10-9 |
|  |  | **6h** |  |
| **Term GO** | **Category** | **FDR** | **P-Value** |
| 1,2-dihydroxy-phenanthrene glycosyltransferase activity | MF | 0.000237 | 2.32x10-6 |
| 1-phenanthrol glycosyltransferase activity | MF | 0.000237 | 2.32x10-6 |
| 5-aminolevulinate synthase activity | MF | 2.01x10-5 | 8.02x10-8 |
| 9-phenanthrol glycosyltransferase activity | MF | 0.000237 | 2.32x10-6 |
| 9-phenanthrol UDP-glucuronosyltransferase activity | MF | 0.000237 | 2.32x10-6 |
| adenylyltransferase activity | MF | 0.000178 | 1.15x10-6 |
| alpha-(1->3)-fucosyltransferase activity | MF | 0.000468 | 5.13x10-6 |
| alpha-(1->6)-fucosyltransferase activity | MF | 0.000468 | 5.13x10-6 |
| alpha-1,2-galactosyltransferase activity | MF | 0.000237 | 2.32x10-6 |
| alpha-1,3-galactosyltransferase activity | MF | 0.000237 | 2.32x10-6 |
| alpha-1,3-mannosyltransferase activity | MF | 0.000237 | 2.32x10-6 |
| alpha-1,6-mannosyltransferase activity | MF | 0.000334 | 3.5x10-6 |
| alternative mRNA splicing, via spliceosome | BP | 1.23x10-18 | 2.45x10-22 |
| apoptotic process | BP | 1.77x10-6 | 4.43x10-9 |
| arginine metabolic process | BP | 2.01x10-5 | 8.02x10-8 |
| ATPase activator activity | MF | 3.36x10-9 | 4.35x10-12 |
| ATPase activity | MF | 1.2x10-5 | 4.55x10-8 |
| ATPase activity, coupled | MF | 1.58x10-9 | 1.73x10-12 |
| ATPase regulator activity | MF | 4.73x10-9 | 7.08x10-12 |
| ATP-dependent peptidase activity | MF | 6.28x10-21 | 6.26x10-25 |
| atrioventricular valve development | BP | 3.27x10-5 | 1.5x10-7 |
| benzoic acid glucosyltransferase activity | MF | 0.000237 | 2.32x10-6 |
| beta-1,4-mannosyltransferase activity | MF | 0.000237 | 2.32x10-6 |
| cell death | BP | 2.16x10-6 | 6.24x10-9 |
| cellular carbohydrate metabolic process | BP | 4.11x10-6 | 1.31x10-8 |
| cellular potassium ion transport | BP | 0.0003 | 3.06x10-6 |
| cellulose synthase activity | MF | 0.000237 | 2.32x10-6 |
| chaperone binding | MF | 1.53x10-6 | 3.66x10-9 |
| chondroitin hydrolase activity | MF | 0.000237 | 2.32x10-6 |
| cyclin-dependent protein serine/threonine kinase inhibitor activity | MF | 1.27x10-6 | 2.91x10-9 |
| cyclin-dependent protein serine/threonine kinase regulator activity | MF | 0.000775 | 9.04x10-6 |
| cytokinin 9-beta-glucosyltransferase activity | MF | 0.000237 | 2.32x10-6 |
| diphosphoinositol-pentakisphosphate kinase activity | MF | 6.61x10-6 | 2.44x10-8 |
| DNA topoisomerase activity | MF | 1.27x10-6 | 2.81x10-9 |
| DNA topoisomerase II activity | MF | 6.46x10-11 | 6.44x10-14 |
| DNA topoisomerase type I activity | MF | 2.36x10-6 | 7.3x10-9 |
| DNA topoisomerase type II (ATP-hydrolyzing) activity | MF | 6.46x10-11 | 6.44x10-14 |
| DNA topological change | BP | 1.27x10-6 | 2.81x10-9 |
| dolichyl pyrophosphate Glc1Man9GlcNAc2 alpha-1,3-glucosyltransferase activity | MF | 0.000237 | 2.32x10-6 |
| dolichyl pyrophosphate Man7GlcNAc2 alpha-1,3-glucosyltransferase activity | MF | 0.000237 | 2.32x10-6 |
| dolichyl pyrophosphate Man9GlcNAc2 alpha-1,3-glucosyltransferase activity | MF | 0.000334 | 3.5x10-6 |
| dolichyl-pyrophosphate Man7GlcNAc2 alpha-1,6-mannosyltransferase activity | MF | 0.000237 | 2.32x10-6 |
| early endosome to late endosome transport | BP | 3.27x10-5 | 1.49x10-7 |
| endogalactosaminidase activity | MF | 0.000237 | 2.32x10-6 |
| endosome organization | BP | 0.000464 | 5x10-6 |
| endosome to lysosome transport | BP | 4.69x10-5 | 2.38x10-7 |
| enzyme inhibitor activity | MF | 3.45x10-7 | 6.55x10-10 |
| FHF complex | CC | 1.27x10-6 | 2.91x10-9 |
| glucuronosyltransferase activity | MF | 0.000954 | 1.15x10-5 |
| glutamine family amino acid metabolic process | BP | 4.21x10-5 | 1.97x10-7 |
| heart valve development | BP | 0.000237 | 2.32x10-6 |
| heat shock protein binding | MF | 0.000237 | 2.15x10-6 |
| hydrolase activity, acting on acid anhydrides | MF | 0.000237 | 2.25x10-6 |
| hydrolase activity, acting on carbon-nitrogen (but not peptide) bonds, in linear amidines | MF | 0.000636 | 7.36x10-6 |
| indole-3-butyrate beta-glucosyltransferase activity | MF | 0.000237 | 2.32x10-6 |
| inositol hexakisphosphate 5-kinase activity | MF | 6.61x10-6 | 2.44x10-8 |
| inositol hexakisphosphate kinase activity | MF | 6.61x10-6 | 2.44x10-8 |
| inositol metabolic process | BP | 2.16x10-6 | 6.24x10-9 |
| inositol phosphoceramide synthase activity | MF | 0.000237 | 2.32x10-6 |
| inositol-1,3,4,5,6-pentakisphosphate kinase activity | MF | 6.61x10-6 | 2.44x10-8 |
| kinase inhibitor activity | MF | 1.64x10-7 | 2.95x10-10 |
| lipopolysaccharide-1,5-galactosyltransferase activity | MF | 0.000237 | 2.32x10-6 |
| lipopolysaccharide-1,6-galactosyltransferase activity | MF | 0.000237 | 2.32x10-6 |
| lysosomal transport | BP | 0.0003 | 3.06x10-6 |
| mRNA splicing, via spliceosome | BP | 0.000103 | 5.57x10-7 |
| negative regulation of catalytic activity | BP | 3.27x10-5 | 1.39x10-7 |
| negative regulation of kinase activity | BP | 0.000237 | 1.98x10-6 |
| negative regulation of molecular function | BP | 0.000171 | 1.09x10-6 |
| negative regulation of protein kinase activity | BP | 0.000147 | 8.94x10-7 |
| negative regulation of protein serine/threonine kinase activity | BP | 3.17x10-5 | 1.3x10-7 |
| negative regulation of transferase activity | BP | 0.000553 | 6.18x10-6 |
| N-succinyltransferase activity | MF | 0.000229 | 1.57x10-6 |
| O antigen polymerase activity | MF | 0.000237 | 2.32x10-6 |
| oxidation-reduction process | BP | 0.00016 | 9.88x10-7 |
| phenanthrol glycosyltransferase activity | MF | 0.000237 | 2.32x10-6 |
| pigment metabolic process | BP | 0.000171 | 1.09x10-6 |
| polynucleotide adenylyltransferase activity | MF | 0.000237 | 1.78x10-6 |
| polyol metabolic process | BP | 3.27x10-5 | 1.48x10-7 |
| positive regulation of ATPase activity | BP | 3.36x10-9 | 4.35x10-12 |
| positive regulation of gliogenesis | BP | 0.000636 | 7.36x10-6 |
| potassium ion transmembrane transport | BP | 0.0003 | 3.06x10-6 |
| potassium ion transport | BP | 0.00094 | 1.12x10-5 |
| programmed cell death | BP | 1.88x10-6 | 5.07x10-9 |
| protein folding | BP | 1.85x10-6 | 4.81x10-9 |
| protein kinase inhibitor activity | MF | 1.64x10-7 | 2.95x10-10 |
| protein serine/threonine kinase inhibitor activity | MF | 2.28x10-6 | 6.83x10-9 |
| protoporphyrinogen Ix biosynthetic process | BP | 0.00012 | 7.16x10-7 |
| protoporphyrinogen Ix metabolic process | BP | 0.00012 | 7.16x10-7 |
| regulation of alternative mRNA splicing, via spliceosome | BP | 1.56x10-17 | 4.68x10-21 |
| regulation of apoptotic process | BP | 4.63x10-5 | 2.26x10-7 |
| regulation of ATPase activity | BP | 4.73x10-9 | 7.08x10-12 |
| regulation of cell death | BP | 4.23x10-5 | 2.03x10-7 |
| regulation of glutamate receptor signaling pathway | BP | 0.000229 | 1.57x10-6 |
| regulation of kainate selective glutamate receptor activity | BP | 0.00012 | 7.16x10-7 |
| regulation of mRNA metabolic process | BP | 4.81x10-11 | 3.83x10-14 |
| regulation of mRNA processing | BP | 1.24x10-14 | 6.16x10-18 |
| regulation of mRNA splicing, via spliceosome | BP | 4.16x10-15 | 1.66x10-18 |
| regulation of neurotransmitter receptor activity | BP | 0.000229 | 1.57x10-6 |
| regulation of potassium ion transmembrane transport | BP | 0.00012 | 7.16x10-7 |
| regulation of potassium ion transmembrane transporter activity | BP | 0.00012 | 7.16x10-7 |
| regulation of programmed cell death | BP | 4.69x10-5 | 2.37x10-7 |
| regulation of response to oxidative stress | BP | 0.000376 | 4.01x10-6 |
| regulation of response to reactive oxygen species | BP | 0.000229 | 1.53x10-6 |
| regulation of RNA splicing | BP | 2.63x10-12 | 1.84x10-15 |
| regulation of sodium ion transmembrane transport | BP | 0.0003 | 3.08x10-6 |
| regulation of sodium ion transmembrane transporter activity | BP | 0.0003 | 3.08x10-6 |
| response to abiotic stimulus | BP | 0.000618 | 6.97x10-6 |
| response to heat | BP | 0.00086 | 1.01x10-5 |
| response to oxidative stress | BP | 0.000521 | 5.77x10-6 |
| response to reactive oxygen species | BP | 0.000106 | 5.79x10-7 |
| response to stimulus | BP | 0.000366 | 3.87x10-6 |
| response to stress | BP | 2.9x10-13 | 1.73x10-16 |
| RNA splicing, via transesterification reactions | BP | 0.000103 | 5.57x10-7 |
| RNA splicing, via transesterification reactions with bulged adenosine as nucleophile | BP | 0.000103 | 5.57x10-7 |
| salicylic acid glucosyltransferase (ester-forming) activity | MF | 0.000237 | 2.32x10-6 |
| salicylic acid glucosyltransferase (glucoside-forming) activity | MF | 0.000237 | 2.32x10-6 |
| single-stranded DNA 5'-3' exodeoxyribonuclease activity | MF | 0.000636 | 7.36x10-6 |
| spliceosomal complex | CC | 4.21x10-6 | 1.38x10-8 |
| UDP-galactosyltransferase activity | MF | 0.000862 | 1.02x10-5 |
| unfolded protein binding | MF | 5.63x10-9 | 8.99x10-12 |
| vesicle-mediated transport between endosomal compartments | BP | 3.27x10-5 | 1.49x10-7 |
|  |  | **Controlx9h** |  |
| **Term GO** | **Category** | **FDR** | **P-Value** |
| active transmembrane transporter activity | MF | 7.13x10-5 | 2.42x10-7 |
| cAMP-dependent protein kinase complex | CC | 0.000499555 | 2.09x10-6 |
| cAMP-dependent protein kinase regulator activity | MF | 0.000499555 | 2.09x10-6 |
| cell cycle G1/S phase transition | BP | 1.26x10-7 | 2.89x10-10 |
| cellular aldehyde metabolic process | BP | 6.46x10-5 | 2.13x10-7 |
| chaperone mediated protein folding requiring cofactor | BP | 0.000562125 | 2.52x10-6 |
| chaperone-mediated protein folding | BP | 0.000821526 | 4.1x10-6 |
| cyclin binding | MF | 7.47x10-12 | 7.4x10-16 |
| 'de novo' posttranslational protein folding | BP | 0.000562125 | 2.5x10-6 |
| 'de novo' protein folding | BP | 0.000562125 | 2.5x10-6 |
| DUBm complex | CC | 0.000821526 | 4.1x10-6 |
| G1 DNA damage checkpoint | BP | 1.52x10-10 | 1.5x10-13 |
| G1/S transition of mitotic cell cycle | BP | 1.26x10-7 | 2.89x10-10 |
| gas transport | BP | 9.38x10-11 | 5.62x10-14 |
| glucose 6-phosphate metabolic process | BP | 1.62x10-8 | 3.38x10-11 |
| glucose metabolic process | BP | 1.29x10-5 | 3.86x10-8 |
| glucose-6-phosphate dehydrogenase activity | MF | 7.25x10-10 | 7.95x10-13 |
| glyceraldehyde-3-phosphate metabolic process | BP | 1.62x10-8 | 3.38x10-11 |
| glycosphingolipid metabolic process | BP | 0.000728161 | 3.34x10-6 |
| heme binding | MF | 0.000499555 | 2.01x10-6 |
| hemoglobin complex | CC | 2.78x10-11 | 1.39x10-14 |
| hydrolase activity, acting on acid anhydrides, catalyzing transmembrane movement of substances | MF | 0.000821526 | 4.03x10-6 |
| hydro-lyase activity | MF | 0.000263909 | 1.03x10-6 |
| mitotic cell cycle checkpoint | BP | 3.89x10-5 | 1.2x10-7 |
| mitotic DNA damage checkpoint | BP | 2.73x10-9 | 3.81x10-12 |
| mitotic DNA integrity checkpoint | BP | 1.06x10-8 | 1.91x10-11 |
| mitotic G1 DNA damage checkpoint | BP | 1.52x10-10 | 1.52x10-13 |
| mitotic G1/S transition checkpoint | BP | 1.52x10-10 | 1.52x10-13 |
| NADP binding | MF | 4.47x10-6 | 1.2x10-8 |
| NADP metabolic process | BP | 2.14x10-7 | 5.11x10-10 |
| negative regulation of cell cycle G1/S phase transition | BP | 2.73x10-9 | 3.81x10-12 |
| negative regulation of cell cycle phase transition | BP | 9.9x10-6 | 2.86x10-8 |
| negative regulation of cell cycle process | BP | 0.000865413 | 4.4x10-6 |
| negative regulation of G1/S transition of mitotic cell cycle | BP | 2.73x10-9 | 3.81x10-12 |
| negative regulation of mitotic cell cycle | BP | 0.000799304 | 3.75x10-6 |
| negative regulation of mitotic cell cycle phase transition | BP | 9.9x10-6 | 2.86x10-8 |
| oxygen binding | MF | 2.79x10-11 | 1.39x10-14 |
| oxygen transport | BP | 2.79x10-11 | 1.39x10-14 |
| oxygen transporter activity | MF | 2.79x10-11 | 1.39x10-14 |
| pentose-phosphate shunt | BP | 1.62x10-8 | 3.38x10-11 |
| phosphatidic acid transporter activity | MF | 4.92x10-5 | 1.57x10-7 |
| P-P-bond-hydrolysis-driven transmembrane transporter activity | MF | 0.000180352 | 6.47x10-7 |
| primary active transmembrane transporter activity | MF | 0.000180352 | 6.47x10-7 |
| regulation of cell cycle G1/S phase transition | BP | 1.06x10-8 | 1.91x10-11 |
| regulation of cell cycle phase transition | BP | 0.000216829 | 8.22x10-7 |
| regulation of G1/S transition of mitotic cell cycle | PP | 1.06x10-8 | 1.91x10-11 |
| regulation of mitotic cell cycle phase transition | BP | 0.000216829 | 8.22x10-7 |
| SCF ubiquitin ligase complex | CC | 1.02x10-10 | 7.15x10-14 |
| SCF-dependent proteasomal ubiquitin-dependent protein catabolic process | MP | 4.46x10-9 | 6.67x10-12 |
| selenocysteinyl-tRNA(Sec) biosynthetic process | BP | 8.4x10-7 | 2.18x10-9 |
| transferase activity, transferring selenium-containing groups | MF | 8.4x10-7 | 2.18x10-9 |
|  |  | **9h** |  |
| **Term GO** | **Category** | **FDR** | **P-Value** |
| I-kappaB/NF-kappaB complex | CC | 7.46x10-7 | 2.83x10-9 |
| 1,2-dihydroxy-phenanthrene glycosyltransferase activity | MF | 0.000128 | 1.37x10-6 |
| 1-phenanthrol glycosyltransferase activity | MF | 0.000128 | 1.37x10-6 |
| 9-phenanthrol glycosyltransferase activity | MF | 0.000128 | 1.37x10-6 |
| 9-phenanthrol UDP-glucuronosyltransferase activity | MF | 0.000128 | 1.37x10-6 |
| adenylyltransferase activity | MF | 2.88x10-16 | 8.62x10-20 |
| alcohol metabolic process | BP | 1.68x10-8 | 4.02x10-11 |
| alpha-(1->3)-fucosyltransferase activity | MF | 0.000259 | 3.56x10-6 |
| alpha-(1->6)-fucosyltransferase activity | MF | 0.000259 | 3.56x10-6 |
| alpha-1,2-galactosyltransferase activity | MF | 0.000128 | 1.37x10-6 |
| alpha-1,2-mannosyltransferase activity | MF | 0.000729 | 1.17x10-5 |
| alpha-1,3-galactosyltransferase activity | MF | 0.000128 | 1.37x10-6 |
| alpha-1,3-mannosyltransferase activity | MF | 0.000128 | 1.37x10-6 |
| alpha-1,6-mannosyltransferase activity | MF | 0.000187 | 2.25x10-6 |
| alternative mRNA splicing, via spliceosome | BP | 1.91x10-16 | 3.81x10-20 |
| apoptotic process | BP | 1.56x10-10 | 1.52x10-13 |
| ATPase activator activity | MF | 1.69x10-5 | 1.05x10-7 |
| ATPase activity, coupled | MF | 0.000487 | 7.43x10-6 |
| ATPase regulator activity | MF | 2.33x10-5 | 1.51x10-7 |
| benzoic acid glucosyltransferase activity | MF | 0.000128 | 1.37x10-6 |
| beta-1,4-mannosyltransferase activity | MF | 0.000128 | 1.37x10-6 |
| cell cycle arrest | BP | 0.000633 | 9.84x10-6 |
| cell death | BP | 2.79x10-9 | 5.56x10-12 |
| cellular carbohydrate metabolic process | BP | 1.6x10-6 | 6.68x10-9 |
| cellular potassium ion transport | BP | 3.37x10-7 | 1.11x10-9 |
| cellular response to fatty acid | BP | 0.000177 | 2.03x10-6 |
| cellular response to hormone stimulus | BP | 0.000249 | 3.31x10-6 |
| cellular response to lipid | BP | 0.000407 | 6.08x10-6 |
| cellular response to prostaglandin stimulus | BP | 0.000177 | 2.03x10-6 |
| cellular response to tumor necrosis factor | BP | 0.000357 | 5.23x10-6 |
| cellulose synthase activity | MF | 0.000128 | 1.37x10-6 |
| chaperone binding | MF | 0.00099 | 1.7x10-5 |
| chondroitin hydrolase activity | MF | 0.000128 | 1.37x10-6 |
| cyclin-dependent protein serine/threonine kinase inhibitor activity | MF | 3.16x10-7 | 9.77x10-10 |
| cyclin-dependent protein serine/threonine kinase regulator activity | MF | 0.000128 | 1.27x10-6 |
| cytokinin 9-beta-glucosyltransferase activity | MF | 0.000128 | 1.37x10-6 |
| diphosphoinositol-pentakisphosphate kinase activity | MF | 9.18x10-10 | 1.56x10-12 |
| diterpenoid metabolic process | BP | 0.000756 | 1.25x10-5 |
| DNA topoisomerase activity | MF | 3.29x10-5 | 2.36x10-7 |
| DNA topoisomerase II activity | MF | 3.23x10-9 | 7.42x10-12 |
| DNA topoisomerase type I activity | MF | 8.44x10-6 | 4.46x10-8 |
| DNA topoisomerase type II (ATP-hydrolyzing) activity | MF | 3.23x10-9 | 7.42x10-12 |
| DNA topological change | BP | 3.29x10-5 | 2.36x10-7 |
| dolichyl pyrophosphate Glc1Man9GlcNAc2 alpha-1,3-glucosyltransferase activity | MF | 0.000128 | 1.37x10-6 |
| dolichyl pyrophosphate Man7GlcNAc2 alpha-1,3-glucosyltransferase activity | MF | 0.000128 | 1.37x10-6 |
| dolichyl pyrophosphate Man9GlcNAc2 alpha-1,3-glucosyltransferase activity | MF | 0.000187 | 2.25x10-6 |
| dolichyl-phosphate-glucose-glycolipid alpha-glucosyltransferase activity | MF | 0.000729 | 1.17x10-5 |
| dolichyl-pyrophosphate Man7GlcNAc2 alpha-1,6-mannosyltransferase activity | MF | 0.000128 | 1.37x10-6 |
| early endosome to late endosome transport | BP | 0.000187 | 2.25x10-6 |
| endogalactosaminidase activity | MF | 0.000128 | 1.37x10-6 |
| endosome to lysosome transport | BP | 2.93x10-5 | 2.01x10-7 |
| enzyme inhibitor activity | MF | 1.19x10-7 | 3.45x10-10 |
| FHF complex | CC | 8.79x10-6 | 4.73x10-8 |
| formation of anatomical boundary | BP | 0.000404 | 6x10-6 |
| galactosyltransferase activity | MF | 0.000877 | 1.5x10-5 |
| gene expression | BP | 0.000277 | 4.01x10-6 |
| glucuronosyltransferase activity | MF | 0.00016 | 1.75x10-6 |
| glutamate receptor signaling pathway | BP | 0.000187 | 2.25x10-6 |
| glycolipid mannosyltransferase activity | MF | 0.000729 | 1.17x10-5 |
| helicase activity | MF | 0.000466 | 7.06x10-6 |
| indole-3-butyrate beta-glucosyltransferase activity | MF | 0.000128 | 1.37x10-6 |
| innate immune response | BP | 0.000248 | 3.27x10-6 |
| inositol hexakisphosphate 5-kinase activity | MF | 9.18x10-10 | 1.56x10-12 |
| inositol hexakisphosphate kinase activity | MF | 9.18x10-10 | 1.56x10-12 |
| inositol metabolic process | BP | 8.44x10-10 | 1.09x10-12 |
| inositol phosphoceramide synthase activity | MF | 0.000128 | 1.37x10-6 |
| inositol-1,3,4,5,6-pentakisphosphate kinase activity | MF | 9.18x10-10 | 1.56x10-12 |
| iridophore differentiation | BP | 0.000247 | 3.2x10-6 |
| kinase inhibitor activity | MF | 6.28x10-8 | 1.63x10-10 |
| lipopolysaccharide-1,5-galactosyltransferase activity | MF | 0.000128 | 1.37x10-6 |
| lipopolysaccharide-1,6-galactosyltransferase activity | MF | 0.000128 | 1.37x10-6 |
| lysosomal transport | BP | 0.000272 | 3.87x10-6 |
| microtubule polymerization | BP | 0.000216 | 2.66x10-6 |
| microtubule polymerization or depolymerization | BP | 0.00099 | 1.71x10-5 |
| molybdopterin synthase complex | CC | 0.000259 | 3.56x10-6 |
| mRNA 3'-end processing | BP | 6.39x10-6 | 3.25x10-8 |
| mRNA metabolic process | BP | 6.91x10-5 | 5.24x10-7 |
| mRNA polyadenylation | BP | 4.59x10-5 | 3.34x10-7 |
| mRNA processing | BP | 5.97x10-6 | 2.98x10-8 |
| mRNA splicing, via spliceosome | BP | 2.71x10-6 | 1.27x10-8 |
| myeloid leukocyte differentiation | BP | 0.000275 | 3.95x10-6 |
| negative regulation of catalytic activity | BP | 0.000117 | 9.56x10-7 |
| negative regulation of molecular function | BP | 1.87x10-6 | 8.02x10-9 |
| negative regulation of protein maturation | BP | 0.000243 | 3.1x10-6 |
| negative regulation of protein processing | BP | 0.000243 | 3.1x10-6 |
| negative regulation of protein serine/threonine kinase activity | BP | 0.000221 | 2.73x10-6 |
| negative regulation of transferase activity | BP | 0.000877 | 1.5x10-5 |
| NIK/NF-kappaB signaling | BP | 2.93x10-5 | 2.01x10-7 |
| nucleic acid binding | MF | 1.13x10-14 | 5.64x10-18 |
| nucleic acid binding transcription factor activity | MF | 1.08x10-9 | 2.05x10-12 |
| O antigen polymerase activity | MF | 0.000128 | 1.37x10-6 |
| organic hydroxy compound metabolic process | BP | 1.13x10-6 | 4.4x10-9 |
| phenanthrol glycosyltransferase activity | MF | 0.000128 | 1.37x10-6 |
| phosphotransferase activity, phosphate group as acceptor | MF | 0.000248 | 3.24x10-6 |
| pineal gland development | BP | 0.000247 | 3.2x10-6 |
| polynucleotide adenylyltransferase activity | MF | 4.52x10-18 | 4.51x10-22 |
| polyol metabolic process | BP | 6.66x10-8 | 1.79x10-10 |
| positive regulation of ATPase activity | BP | 1.69x10-5 | 1.05x10-7 |
| positive regulation of gliogenesis | BP | 7.71x10-5 | 6x10-7 |
| positive regulation of nucleic acid-templated transcription | BP | 0.000729 | 1.19x10-5 |
| positive regulation of transcription, DNA-templated | BP | 0.000729 | 1.19x10-5 |
| potassium ion transmembrane transport | BP | 3.37x10-7 | 1.11x10-9 |
| potassium ion transport | BP | 8.44x10-6 | 4.46x10-8 |
| primary alcohol metabolic process | BP | 0.000756 | 1.25x10-5 |
| programmed cell death | BP | 1.71x10-10 | 1.88x10-13 |
| protein kinase inhibitor activity | MF | 6.28x10-8 | 1.63x10-10 |
| protein serine/threonine kinase inhibitor activity | MF | 7.46x10-7 | 2.83x10-9 |
| regulation of alternative mRNA splicing, via spliceosome | BP | 1.27x10-15 | 5.06x10-19 |
| regulation of apoptotic process | BP | 1.29x10-5 | 7.35x10-8 |
| regulation of ATPase activity | BP | 2.33x10-5 | 1.51x10-7 |
| regulation of biosynthetic process | BP | 0.00078 | 1.3x10-5 |
| regulation of cation channel activity | BP | 0.000187 | 2.25x10-6 |
| regulation of cation transmembrane transport | BP | 0.000369 | 5.44x10-6 |
| regulation of cell death | BP | 9.83x10-5 | 7.74x10-7 |
| regulation of cellular metabolic process | BP | 1.47x10-5 | 8.82x10-8 |
| regulation of gene expression | BP | 2.35x10-7 | 7.03x10-10 |
| regulation of glutamate receptor signaling pathway | BP | 1.36x10-6 | 5.54x10-9 |
| regulation of hemopoiesis | BP | 1.81x10-5 | 1.14x10-7 |
| regulation of ion transmembrane transporter activity | BP | 0.000729 | 1.17x10-5 |
| regulation of kainate selective glutamate receptor activity | BP | 3.55x10-7 | 1.28x10-9 |
| regulation of leukocyte differentiation | BP | 0.000137 | 1.49x10-6 |
| regulation of macromolecule metabolic process | BP | 6.81x10-5 | 5.09x10-7 |
| regulation of metabolic process | BP | 7.6x10-5 | 5.84x10-7 |
| regulation of mRNA metabolic process | BP | 3.23x10-9 | 7.15x10-12 |
| regulation of mRNA processing | BP | 1.32x10-12 | 9.24x10-16 |
| regulation of mRNA splicing, via spliceosome | BP | 3.95x10-13 | 2.37x10-16 |
| regulation of myeloid cell differentiation | BP | 2.43x10-6 | 1.07x10-8 |
| regulation of myeloid leukocyte differentiation | BP | 2.37x10-5 | 1.56x10-7 |
| regulation of neurotransmitter receptor activity | BP | 1.36x10-6 | 5.54x10-9 |
| regulation of nitrogen compound metabolic process | BP | 9.83x10-6 | 5.49x10-8 |
| regulation of nucleobase-containing compound metabolic process | BP | 0.000128 | 1.16x10-6 |
| regulation of potassium ion transmembrane transport | BP | 3.55x10-7 | 1.28x10-9 |
| regulation of potassium ion transmembrane transporter activity | BP | 3.55x10-7 | 1.28x10-9 |
| regulation of potassium ion transport | BP | 3.28x10-5 | 2.29x10-7 |
| regulation of primary metabolic process | BP | 1.47x10-5 | 8.82x10-8 |
| regulation of programmed cell death | BP | 1.35x10-5 | 7.79x10-8 |
| regulation of protein maturation | BP | 0.000243 | 3.1x10-6 |
| regulation of protein processing | BP | 0.000243 | 3.1x10-6 |
| regulation of receptor activity | BP | 0.000259 | 3.56x10-6 |
| regulation of RNA metabolic process | BP | 2.93x10-5 | 2x10-7 |
| regulation of RNA splicing | BP | 2.72x10-10 | 3.25x10-13 |
| regulation of sodium ion transmembrane transport | BP | 3.65x10-6 | 1.78x10-8 |
| regulation of sodium ion transmembrane transporter activity | BP | 3.65x10-6 | 1.78x10-8 |
| regulation of sodium ion transport | BP | 6x10-5 | 4.43x10-7 |
| regulation of translational initiation | BP | 0.000633 | 9.84x10-6 |
| regulation of transmembrane transporter activity | BP | 0.000729 | 1.17x10-5 |
| response to cytokine | BP | 0.000117 | 9.56x10-7 |
| response to fatty acid | BP | 0.000177 | 2.03x10-6 |
| response to hormone | BP | 0.00045 | 6.77x10-6 |
| response to prostaglandin | BP | 0.000177 | 2.03x10-6 |
| retinoid metabolic process | BP | 0.000756 | 1.25x10-5 |
| retinol metabolic process | BP | 0.000212 | 2.58x10-6 |
| rhombomere boundary formation | BP | 0.000266 | 3.77x10-6 |
| rhombomere development | BP | 0.000266 | 3.77x10-6 |
| rhombomere formation | BP | 0.000266 | 3.77x10-6 |
| rhombomere morphogenesis | BP | 0.000266 | 3.77x10-6 |
| RNA 3'-end processing | BP | 1.56x10-10 | 1.55x10-13 |
| RNA polyadenylation | BP | 9.26x10-11 | 7.39x10-14 |
| RNA splicing | BP | 0.000253 | 3.38x10-6 |
| RNA splicing, via transesterification reactions | BP | 2.71x10-6 | 1.27x10-8 |
| RNA splicing, via transesterification reactions with bulged adenosine as nucleophile | BP | 2.71x10-6 | 1.27x10-8 |
| salicylic acid glucosyltransferase (ester-forming) activity | MF | 0.000128 | 1.37x10-6 |
| salicylic acid glucosyltransferase (glucoside-forming) activity | MF | 0.000128 | 1.37x10-6 |
| sequence-specific DNA binding | MF | 0.000176 | 1.95x10-6 |
| signaling receptor activity | MF | 0.000877 | 1.5x10-5 |
| sodium ion transmembrane transport | BP | 0.0001 | 8.01x10-7 |
| spliceosomal complex | CC | 8.87x10-6 | 4.87x10-8 |
| steroid hormone receptor activity | MF | 0.000821 | 1.38x10-5 |
| Toll signaling pathway | BP | 1.19x10-7 | 3.42x10-10 |
| transcription factor activity, sequence-specific DNA binding | MF | 1.08x10-9 | 2.05x10-12 |
| tumor necrosis factor-mediated signaling pathway | BP | 0.000357 | 5.23x10-6 |
| UDP-galactosyltransferase activity | MF | 0.000526 | 8.08x10-6 |
| vesicle-mediated transport between endosomal compartments | BP | 0.000187 | 2.25x10-6 |
